1 **Myofiber injury induces capillary disruption and regeneration of disorganized**  
2 **microvascular networks**

3  
4 Nicole L. Jacobsen<sup>1</sup>, Charles E. Norton<sup>1</sup>, Rebecca L. Shaw<sup>1</sup>, DDW Cornelison<sup>2,3</sup>, Steven  
5 S. Segal<sup>1,4</sup>.

6  
7 <sup>1</sup>Medical Pharmacology and Physiology, <sup>2</sup>Biological Sciences, <sup>3</sup>Christopher S. Bond Life  
8 Sciences Center, <sup>4</sup>Dalton Cardiovascular Research Center; University of Missouri,  
9 Columbia, MO 65212

10

11 Running Head: Capillary network remodeling during skeletal muscle regeneration

12

13 Correspondence:

14 Steven S. Segal, PhD

15 University of Missouri

16 Medical Pharmacology and Physiology

17 MA415 Medical Sciences Building

18 1 Hospital Drive

19 Columbia, MO 65212

20 Phone: (573) 882-2553

21 Email: [segalss@health.missouri.edu](mailto:segalss@health.missouri.edu)

22

23 Keywords: capillaries, microcirculation, myofiber, skeletal muscle regeneration

24 **Abstract**

25 Myofibers regenerate following injury, however the microvasculature must also  
26 recover to restore skeletal muscle function. We aimed to define the nature of  
27 microvascular damage and repair during skeletal muscle injury and regeneration induced  
28 by BaCl<sub>2</sub>. To test the hypothesis that microvascular disruption occurred secondary to  
29 myofiber injury in mice, isolated microvessels were exposed to BaCl<sub>2</sub> or the myotoxin was  
30 injected into the gluteus maximus (GM) muscle. In isolated microvessels, BaCl<sub>2</sub>  
31 depolarized smooth muscle cells and endothelial cells while increasing [Ca<sup>2+</sup>]<sub>i</sub>, but did not  
32 elicit cell death. At 1 day post injury (dpi) of the GM, capillary fragmentation coincided  
33 with myofiber degeneration while arteriolar and venular networks remained intact;  
34 neutrophil depletion before injury did not prevent capillary damage. Perfused capillary  
35 networks reformed by 5 dpi in association with more terminal arterioles and were dilated  
36 through 10 dpi; with no change in microvascular area or branch point number in  
37 regenerating networks, fewer capillaries aligned with myofibers and capillary networks  
38 were no longer organized into microvascular units. By 21 dpi, capillary orientation and  
39 organization had nearly recovered to that in uninjured GM. We conclude that following  
40 their disruption secondary to myofiber damage, capillaries regenerate as disorganized  
41 networks that remodel while regenerated myofibers mature.

## 42 **Introduction**

43           Skeletal muscle regeneration is an intricate process that requires the activation,  
44 proliferation, and differentiation of resident stem cells called satellite cells (1). However,  
45 the restoration of intact, functional muscle requires the coordinated recovery of additional  
46 cell types and tissue components during myogenesis, particularly the microcirculation.  
47 When compared to the well-defined molecular and cellular events of myofiber  
48 degeneration and regeneration [for review, see (2)], little is known of how skeletal muscle  
49 injury and regeneration affect its microvascular supply.

50           The microvasculature of skeletal muscle consists of arterioles, capillaries, and  
51 venules comprising networks of branches arranged in series and in parallel (3). The  
52 microcirculation delivers oxygen and nutrients to myofibers while removing cellular debris  
53 and products of metabolism. To meet these physiological demands, the microcirculation  
54 responds acutely by regulating local blood flow [e.g., functional hyperemia in response to  
55 muscle contraction, (4)] and adapts to chronic use by modifying network morphology [e.g.,  
56 increased capillarization, arteriogenesis; (5, 6)].

57           To study muscle injury and regeneration in mice, intramuscular injection of the  
58 myotoxic agent BaCl<sub>2</sub> induces reproducible damage while sparing sufficient satellite cells  
59 to support myofiber regeneration (7). As shown in the gluteus maximus muscle (GM),  
60 BaCl<sub>2</sub> injection also damages capillaries (8, 9), which undergo fragmentation within 1 day  
61 post injury (dpi), thereby eliminating local perfusion and solute transport. BaCl<sub>2</sub>-induced  
62 myofiber death occurs through depolarization of the sarcolemma leading to Ca<sup>2+</sup>  
63 overload, membrane disruption, and proteolysis (8). However, it is unknown how BaCl<sub>2</sub>  
64 results in capillary fragmentation *in vivo*. While freeze injury and injection of snake venom

65 toxins also disrupt capillaries accompanied by with myofiber damage (7), it is unknown  
66 whether capillary fragmentation is a direct effect of the initial insult by BaCl<sub>2</sub> or is a  
67 consequence of myofiber disruption. Nor has it been determined whether arteriolar and  
68 venular networks, which supply and drain capillary networks, are disrupted in the manner  
69 shown for capillaries.

70 Ischemic injury to skeletal muscle is followed by robust angiogenesis with an  
71 increase in capillary-to-myofiber ratio (7, 10). Following injury with BaCl<sub>2</sub>, endothelial  
72 sprouts appear within 2-3 dpi, with the ensuing regeneration of capillary networks  
73 restoring local perfusion by 5 dpi (8, 9). At this time, arteriolar networks are abnormally  
74 dilated, with recovery of blood flow control (vasomotor tone, dilation, and constriction)  
75 occurring by 21 dpi in the mouse GM as regenerating myofibers mature (8). Nevertheless,  
76 the cellular dynamics of revascularization and microvascular remodeling during myofiber  
77 regeneration are poorly understood. In this study we tested the hypotheses that 1) BaCl<sub>2</sub>  
78 induces death of microvascular endothelial cells (ECs) and smooth muscle cells (SMCs)  
79 by triggering Ca<sup>2+</sup> overload; and 2) capillaries proliferate during early regeneration with  
80 networks remodeling as regenerating myofibers mature.

81

## 82 **Results**

83 Previous studies evaluating microvascular injury did not resolve whether damage  
84 and loss of perfusion were a direct effect of BaCl<sub>2</sub> on vascular cells or was secondary to  
85 disruption of myofibers and leukocyte infiltration (7-9). Therefore, to evaluate the effect of  
86 BaCl<sub>2</sub> on microvascular ECs and SMCs independent of surrounding myofibers or  
87 inflammation, superior epigastric arteries (SEAs) having a single layer of each cell type

88 were isolated and exposed to BaCl<sub>2</sub> *in vitro*. SMCs were studied in the wall of intact  
89 vessels and ECs were evaluated in endothelial tubes following dissociation of SMCs (11).

90

91 *BaCl<sub>2</sub> induces depolarization and increases Ca<sup>2+</sup> in SMCs causing vasoconstriction*

92 Adding 1.2% BaCl<sub>2</sub> during superfusion of SEAs progressively depolarized SMCs  
93 from  $-48 \pm 5$  mV (baseline) to  $-19 \pm 2$  mV over several min (Fig 1A & B). In endothelial  
94 tubes, BaCl<sub>2</sub> depolarized ECs from  $-41 \pm 1$  mV (baseline) to  $-20 \pm 2$  mV over a similar  
95 time course (Fig 1B). Electrical responses plateaued in  $7 \pm 1$  min.

96 In SMCs, membrane depolarization is accompanied by a rise in [Ca<sup>2+</sup>]<sub>i</sub> through  
97 activation of voltage gated (L-type) Ca<sup>2+</sup> channels in the plasma membrane (12).  
98 Corresponding to depolarization (Fig 1B), exposure to BaCl<sub>2</sub> increased SMC [Ca<sup>2+</sup>]<sub>i</sub> (Fig  
99 1C) and constricted SEAs from  $76 \pm 8$  μm (baseline) to  $34 \pm 10$  μm BaCl<sub>2</sub> (Fig 1D). In the  
100 absence of voltage gated Ca<sup>2+</sup> channels in ECs (13), depolarization with BaCl<sub>2</sub> had no  
101 effect on EC [Ca<sup>2+</sup>]<sub>i</sub>. Controls performed without BaCl<sub>2</sub> confirmed that V<sub>m</sub> and [Ca<sup>2+</sup>]<sub>i</sub> of  
102 SMCs in pressurized SEAs and of ECs in endothelial tubes remained stable for the  
103 duration of recordings (14-16).

104

105 *BaCl<sub>2</sub> does not directly cause microvascular cell death*

106 Exposure of the mouse extensor digitorum longus (EDL) muscle to 1.2% BaCl<sub>2</sub>  
107 promptly depolarized myofibers and increased [Ca<sup>2+</sup>]<sub>i</sub>, leading to disruption of the  
108 sarcolemma and proteolysis culminating in cell death within 1 h (8). We questioned  
109 whether BaCl<sub>2</sub> affected microvascular cells in a similar manner. Contrary to our  
110 hypothesis, 1 h exposure to 1.2% BaCl<sub>2</sub> was not lethal to SMCs or ECs in intact vessels

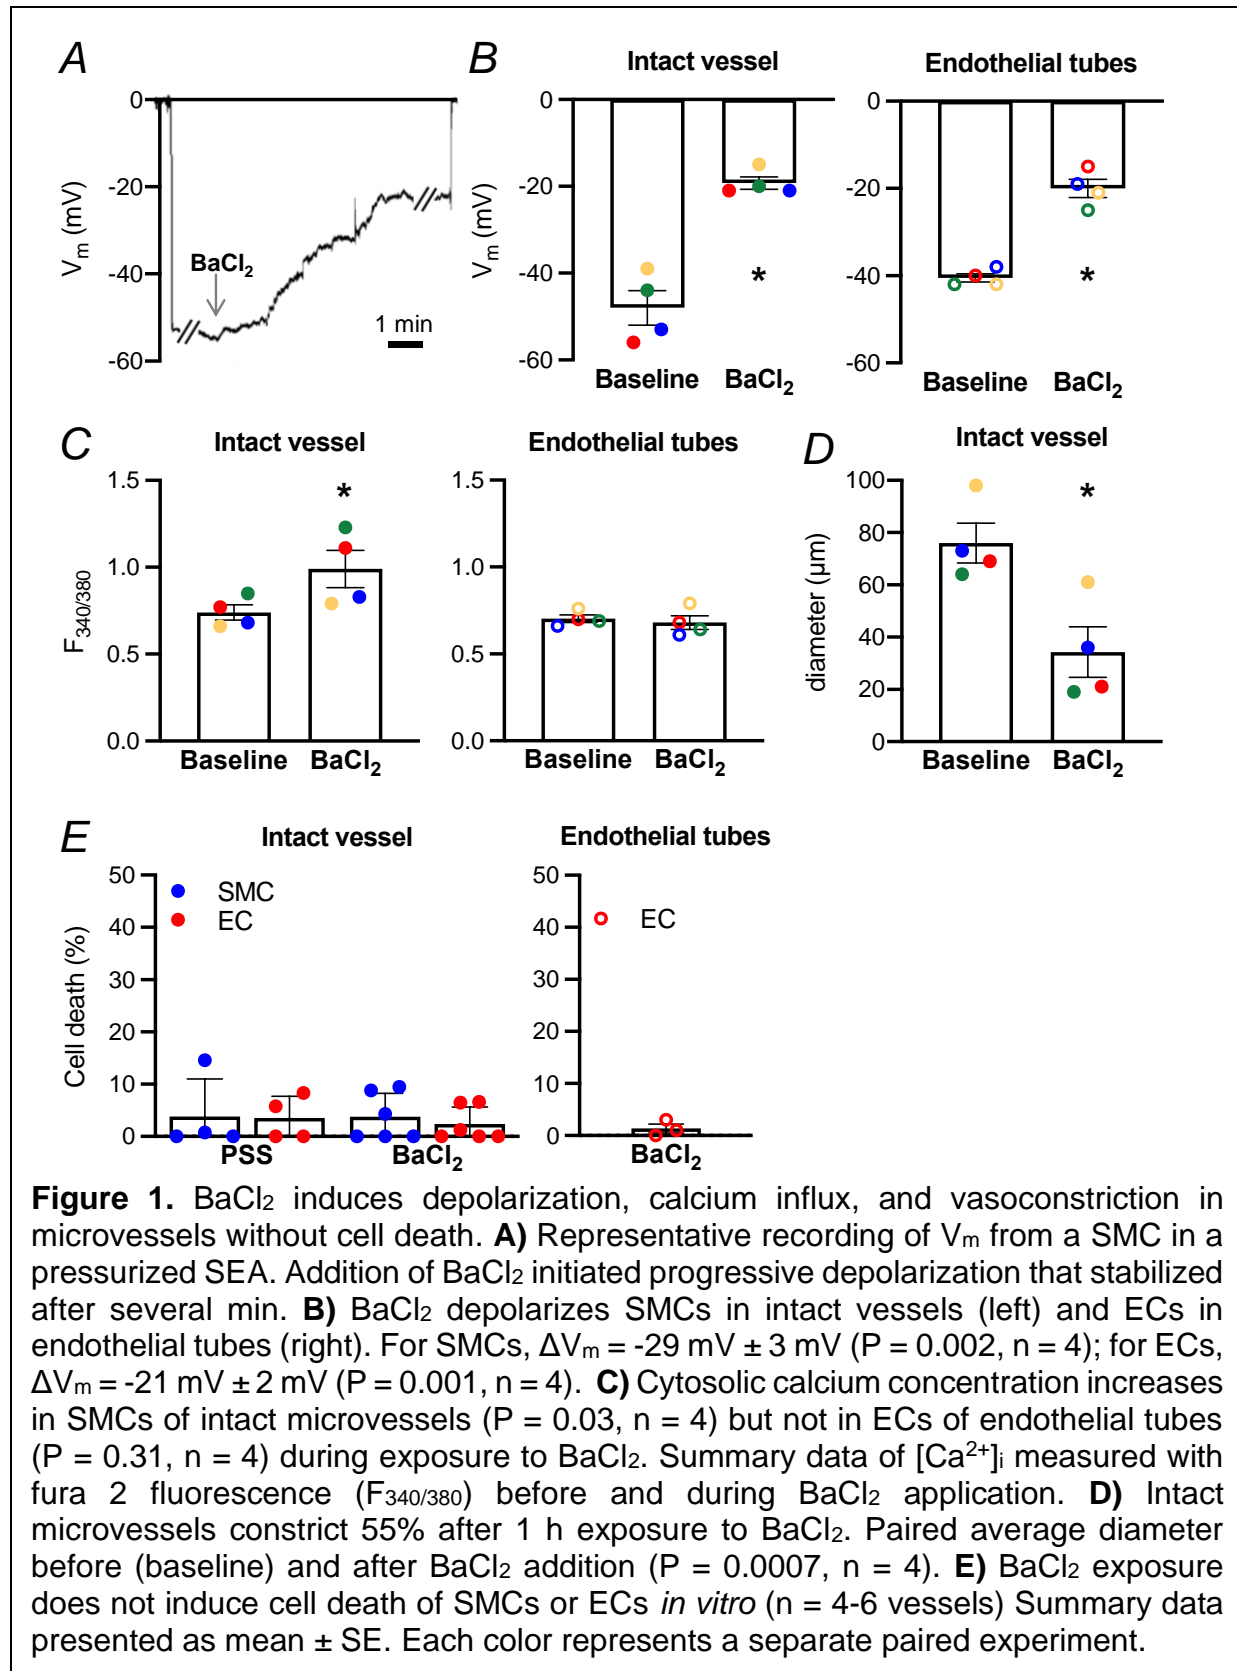

112 or to ECs in endothelial tubes (Fig 1E). Furthermore, extending BaCl<sub>2</sub> exposure to 3 h  
113 had no further effect on EC or SMC viability (n = 3, not shown). These data suggest that,  
114 rather than a direct effect of BaCl<sub>2</sub>, the adverse microenvironment within an intact muscle  
115 created by myofiber injury and degeneration leads to disruption of capillary ECs.

116

#### 117 *Arterioles and venules are spared from BaCl<sub>2</sub>-induced muscle injury*

118 Capillaries are fragmented and perfusion is abolished within 24 h of muscle injury  
119 (7-9). At this early timepoint, leakage of a 70 kDa dextran from residual microvessels  
120 suggested a loss of structural integrity of arterioles or venules (9). To investigate whether  
121 pre- and post-capillary microvessels are also damaged by muscle injury, the GM of male  
122 C57Bl/6J mice was injured by injection of 75 µL of 1.2% BaCl<sub>2</sub> under the muscle (9).  
123 Whole mount immunostaining of the GM with Myh11 labelled SMCs that encircle  
124 arterioles and venules embedded within skeletal muscle. While other cell types may  
125 express Myh11, they are not localized to the abluminal surface of larger caliber  
126 microvessels thereby enabling positive identification of SMCs (17, 18). As seen for  
127 isolated microvessels exposed to BaCl<sub>2</sub> (Fig 1E), the structural integrity of SMCs within  
128 arteriolar networks of the GM remained essentially intact at 1 dpi, though infrequent  
129 damage was observed (Fig 2). Continuous SMC coverage and arteriolar segments with  
130 uniform diameter was not different at 1 dpi compared to uninjured muscle. The integrity  
131 of venular segments and their SMCs was also preserved (Fig 2A & B). Our quantitative  
132 analyses therefore centered on capillary and precapillary (resistance) networks.

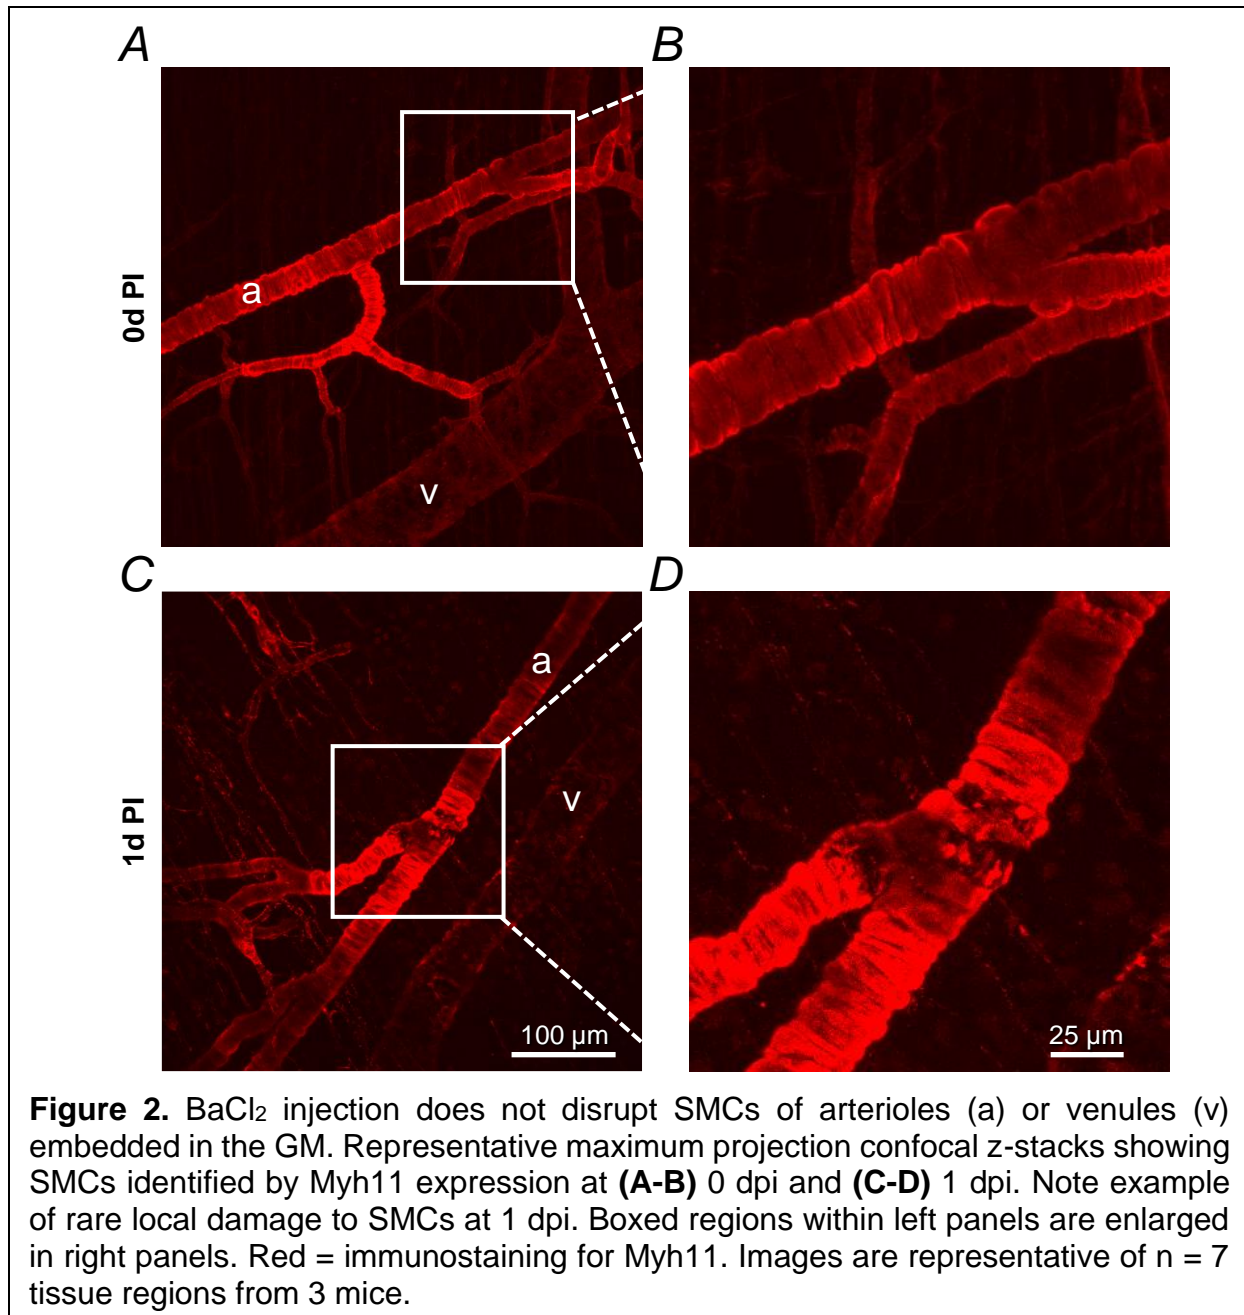

133

134 *Role of neutrophils in BaCl<sub>2</sub>-induced capillary damage*

135 Muscle injury initiates a stereotypical inflammatory response, with neutrophils  
136 invading within 1-2 h of injury and peaking at 12-24 h post injury (19). Neutrophils release  
137 cytolytic and cytotoxic molecules that may damage other resident cell types, along with



138 cytokines that attract monocytes and macrophages to remove cellular debris (20). Given  
139 the disruption of capillaries following intramuscular injection of BaCl<sub>2</sub> (7, 8) compared to  
140 the integrity of ECs exposed to BaCl<sub>2</sub> *in vitro* (Fig 1E), we tested whether invading  
141 neutrophils are necessary for capillary fragmentation after BaCl<sub>2</sub> injury. Differential blood  
142 counts determined that circulating neutrophils comprised  $12.6 \pm 1.8\%$  ( $n = 4$ ) of white  
143 blood cells in uninjured male C57BL/6J mice. At 1 dpi, neutrophils increased to  $49.5 \pm$   
144  $3.2\%$  of circulating white blood cells ( $P < 0.0001$ ). Intraperitoneal injections of anti-Ly6G  
145 ab prior to BaCl<sub>2</sub> injury reduced circulating neutrophils at 0 dpi and at 1 dpi ( $4.3 \pm 3.0\%$   
146 and  $2.9 \pm 2.0\%$ , respectively;  $P < 0.0001$ ;  $n = 4$  mice per group).

147 Using an EC-specific Cre driver [Cdh5-Cre<sup>ERT2</sup>; (21)] and tamoxifen-induced  
148 recombination of the Rosa26<sup>mTmG</sup> locus to genetically label the endothelium with  
149 membrane-bound eGFP (Cdh5-mTmG mice), we evaluated capillary network structure in  
150 whole mount preparations of the GM. The orderly arrangement of capillary networks that  
151 course along myofibers in uninjured muscle (Fig 3A) was not impacted by neutrophil  
152 depletion alone. Following BaCl<sub>2</sub> injury, capillaries were fragmented at 1 dpi (Fig 3A),  
153 which explains the loss of perfusion at this time (9). While neutrophil depletion did not  
154 prevent this capillary damage, there was a trend for preserving tissue area occupied by  
155 capillaries (Fig 3B,  $P = 0.28$ ). As an index of capillary fragmentation with fewer pathways  
156 for blood flow, the maximum continuous length of networks was decreased at 1 dpi  
157 compared to 0 dpi (Fig 3C). There was a trend for the maximum continuous length to be  
158 greater at 1 dpi following neutrophil depletion, but the effect was not significant (Fig 3C,  
159  $P = 0.18$ ). Nevertheless, neutrophil-depleted mice exhibited greater capillary perfusion as  
160 visualized by FITC-dextran circulating in the bloodstream (Fig 3D).

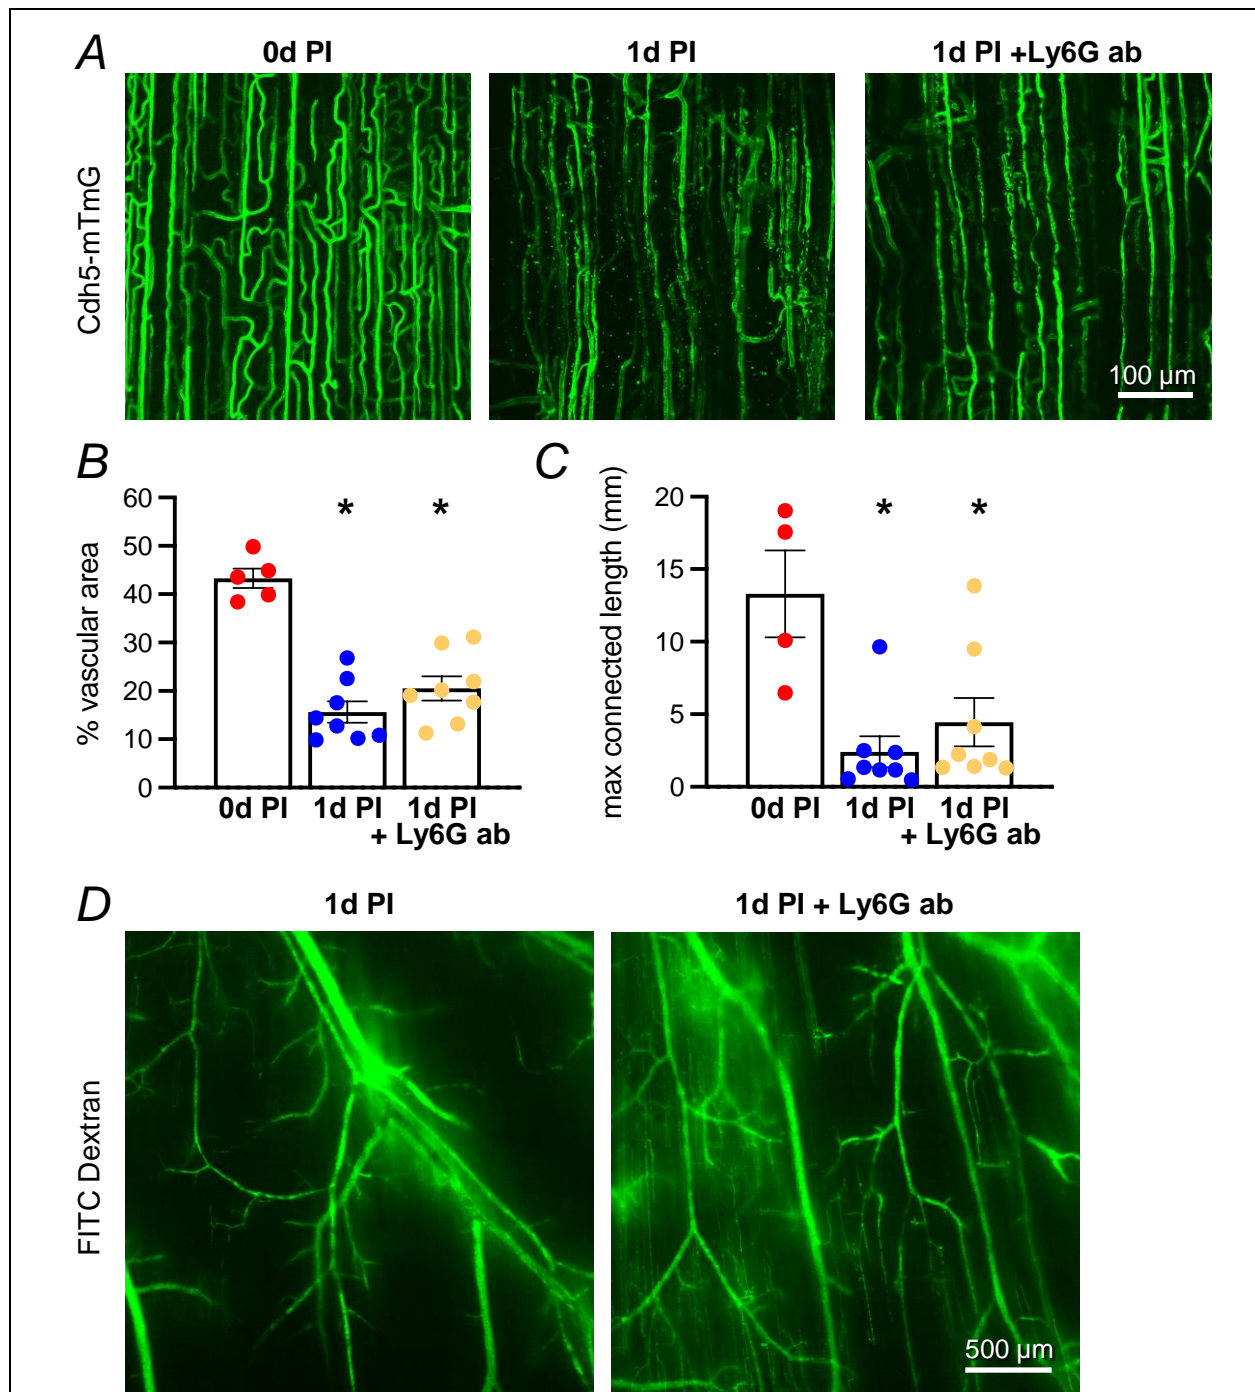

**Figure 3.** Skeletal muscle injury with BaCl<sub>2</sub> disrupts capillary networks. **A)** Representative maximum projection z-stacks of GM from 4-5 Cdh5-mTmG mice. Capillary ECs (green; eGFP) are well organized and align with myofibers (oriented vertically, not shown) in uninjured muscle at 0 dpi. At 1 dpi after BaCl<sub>2</sub> injection, capillaries are fragmented with few intact segments. Neutrophil depletion with Ly6G antibody (+ Ly6G ab) affords partial protection against capillary damage at 1 dpi. Scale bar applies to all panels. **B)** Muscle injury with BaCl<sub>2</sub> decreases the % area occupied by capillary ECs at 1 dpi. Neutrophil depletion did not prevent capillary fragmentation at 1 dpi. \*1 dpi (n = 8) and 1 dpi + Ly6G antibody (n = 8), P < 0.0001 vs. 0 dpi (n = 5). **C)** Injury by BaCl<sub>2</sub> decreases the maximum continuous length of capillary networks, indicating fragmentation. \*1 dpi (n = 8), \*1 dpi + Ly6G ab (n = 8), \*P < 0.01 vs. 0 dpi (n = 4). **D)** Representative images from 4 mice show intravascular FITC-dextran (green, 70 kDa) labeling of perfused residual microvascular networks with some dye leakage into surrounding tissue. At 1 dpi, more capillaries remain perfused by FITC-dextran following neutrophil depletion using Ly6G ab. Scale bar applies to both panels. Summary data in B and C are means  $\pm$  SE.

162 *Regenerating capillary networks are dilated and disorganized*

163 By 2-3 dpi, endothelial sprouts emerge from surviving capillary segments at  
164 multiple initiation points. The ensuing angiogenesis reestablished perfused networks at 5  
165 dpi (Fig 4A) as reported (9). After a ~65% reduction at 1 dpi (Fig 3B), the % vascular area  
166 recovered to uninjured levels at 5 dpi (Fig 4B) and did not change thereafter. However,  
167 capillary networks appeared disorganized and dilated during their regeneration, with  
168 diameter increasing from  $4.7 \pm 0.1 \mu\text{m}$  at 0 dpi to  $6.9 \pm 0.2 \mu\text{m}$  at 5 dpi and  $6.1 \pm 0.6 \mu\text{m}$

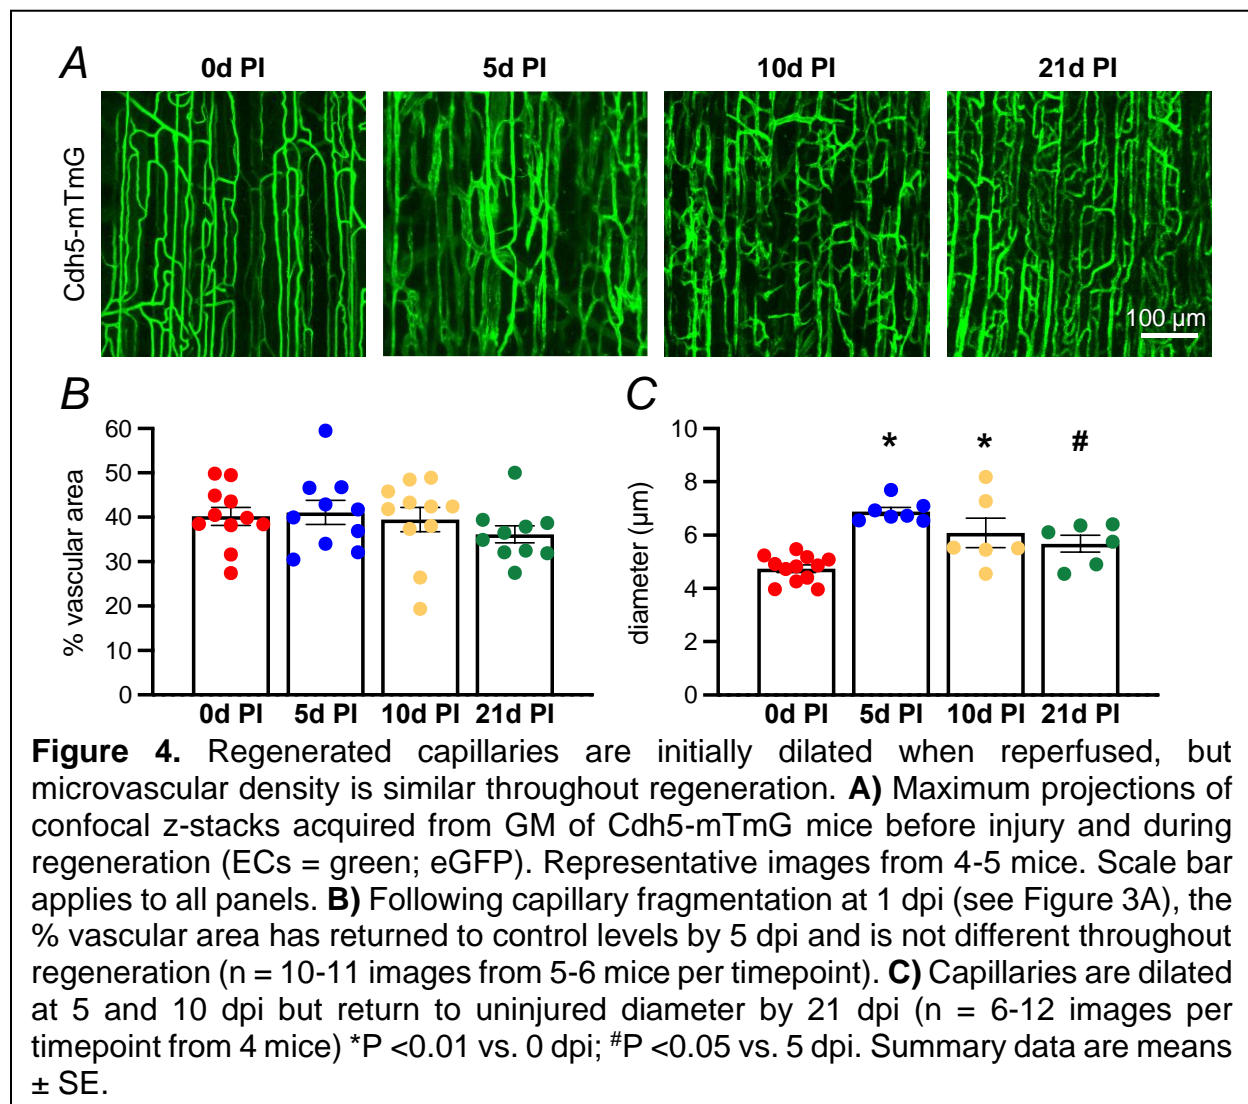

169 at 10 dpi (Fig 4C). By 21 dpi, capillary diameter ( $5.7 \pm 0.3 \mu\text{m}$ ) was no longer significantly  
170 different from uninjured controls.

171 To quantitatively examine morphological changes in regenerating capillary  
172 networks, we first evaluated the number of branch points. In uninjured muscle (0 dpi),  
173 there was  $26 \pm 2$  branch points/mm of network length and this value did not change  
174 throughout regeneration (Fig 5A). However, capillary regeneration was nonuniform.  
175 Poorly vascularized regions (not shown) were located adjacent to regions of high  
176 angiogenic activity which often had elongating sprouts that connected with neighboring  
177 capillaries to form a dense microvascular mesh (Fig 5B) that resembled a developmental  
178 vascular plexus (22). Trifurcations not found in uninjured muscle were also present within  
179 regenerating networks at 10 dpi, albeit with low incidence (Fig 5B).

180 Nascent capillaries grew in multiple directions such that fewer capillaries aligned  
181 with regenerating myofibers, as documented by an orientation analysis. To calculate the  
182 % of capillary segments parallel to myofibers, the distribution of their angles was plotted  
183 relative to myofibers, which were oriented vertically at  $0^\circ$  for reference and horizontal  
184 defined as  $-90^\circ$  and  $+90^\circ$ . Capillary segments in uninjured GM oriented within 1 standard  
185 deviation of vertical were considered parallel to myofibers ( $-5$  to  $+5^\circ$ ). This interval was  
186 used as a reference for 5, 10 and 21 dpi in Figure 5. In uninjured muscle (0 dpi),  $47 \pm 3\%$   
187 of capillaries were parallel to myofibers (Fig 5C). However, at 5 dpi, only  $34 \pm 2\%$  of  
188 regenerated capillaries were parallel with myofibers; this structural disorientation  
189 persisted through 10 dpi. However, by 21 dpi the % of capillaries orientated parallel to  
190 myofibers was no longer different from 0 dpi. Capillary network disorientation was  
191 manifested by the loss of identifiable microvascular units (MVUs), defined as a group of

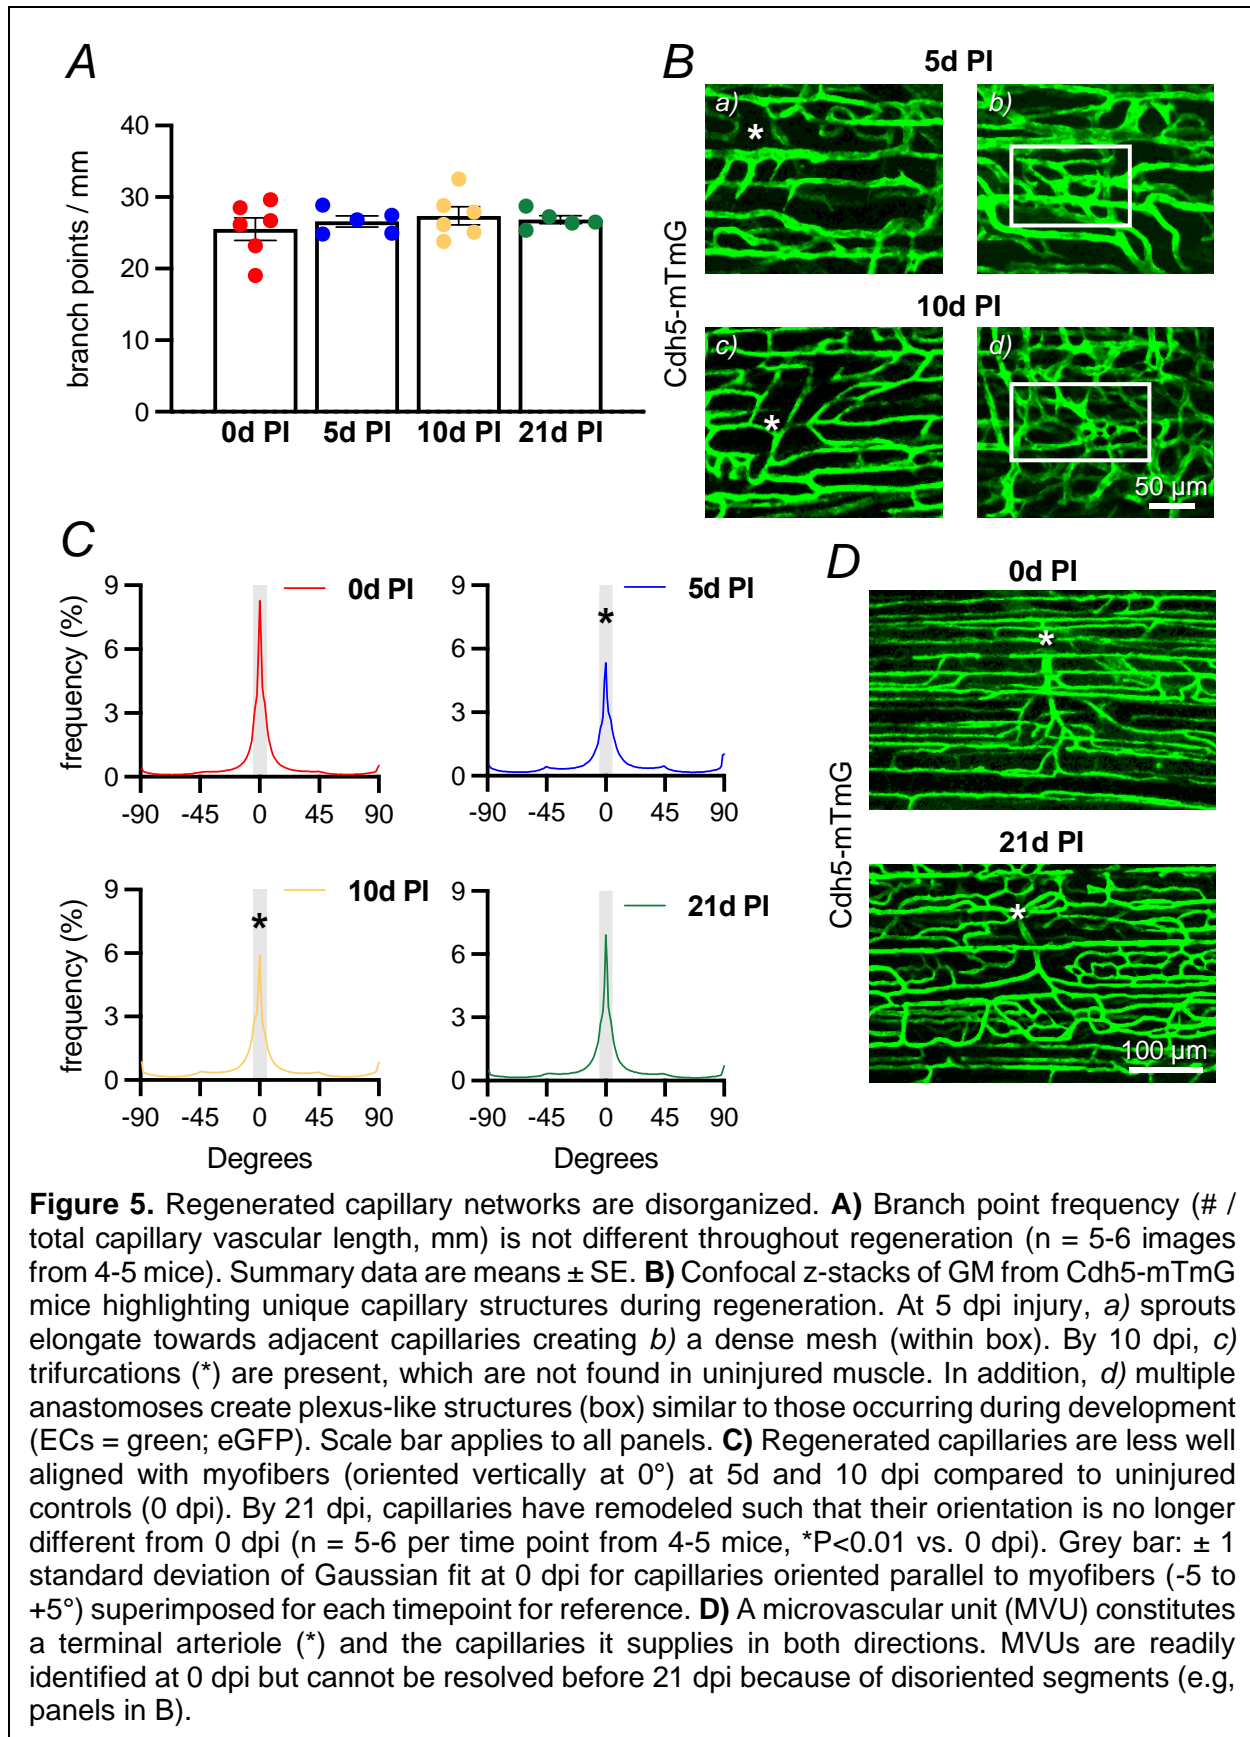

193 capillaries supplied by a common terminal arteriole (23). Restoration of organized MVUs  
194 characteristic of uninjured skeletal muscle was not apparent until 21 dpi (Fig 5D), which  
195 corresponds with maturation of regenerating myofibers in the mouse GM following BaCl<sub>2</sub>  
196 injury (9).

197

### 198 *Terminal arterioles remodel during muscle regeneration*

199 Finding minimal cellular damage in arterioles (Fig 2) but extensive remodeling of  
200 capillaries and MVUs (Fig 5), we questioned whether the architecture of arteriolar  
201 networks underwent remodeling during regeneration. At criterion timepoints, the GM  
202 vasculature of male C57BL/6J mice was manually traced from the inferior gluteal artery  
203 (feed artery) to terminal arterioles (Fig 6). Resulting traces included intra-network  
204 anastomoses and collateral connections to arterioles originating from the superior gluteal  
205 artery.

206 Uninjured muscle contained  $452 \pm 78$  microvessel segments (Fig 7A). During  
207 regeneration, the total # of segments was not different compared to 0 dpi; the total  
208 vascular length was also not different at the timepoints studied. However, when  
209 categorized by microvessel diameter, the # of arterioles 5-10  $\mu\text{m}$  in diameter (i.e., terminal  
210 arterioles) increased at 5 dpi compared to 0 dpi and remained elevated through 21 dpi  
211 (Fig 7B). The corresponding cumulative vascular length of the smallest arterioles was  
212 also increased at 5 dpi vs. 0 dpi indicating proliferation of terminal arterioles (Fig 7C). In  
213 addition, more anastomoses were present in microvascular networks at 5 dpi than other  
214 timepoints (Fig 7D), reflecting the rapid angiogenesis during the early stages of  
215 regeneration.

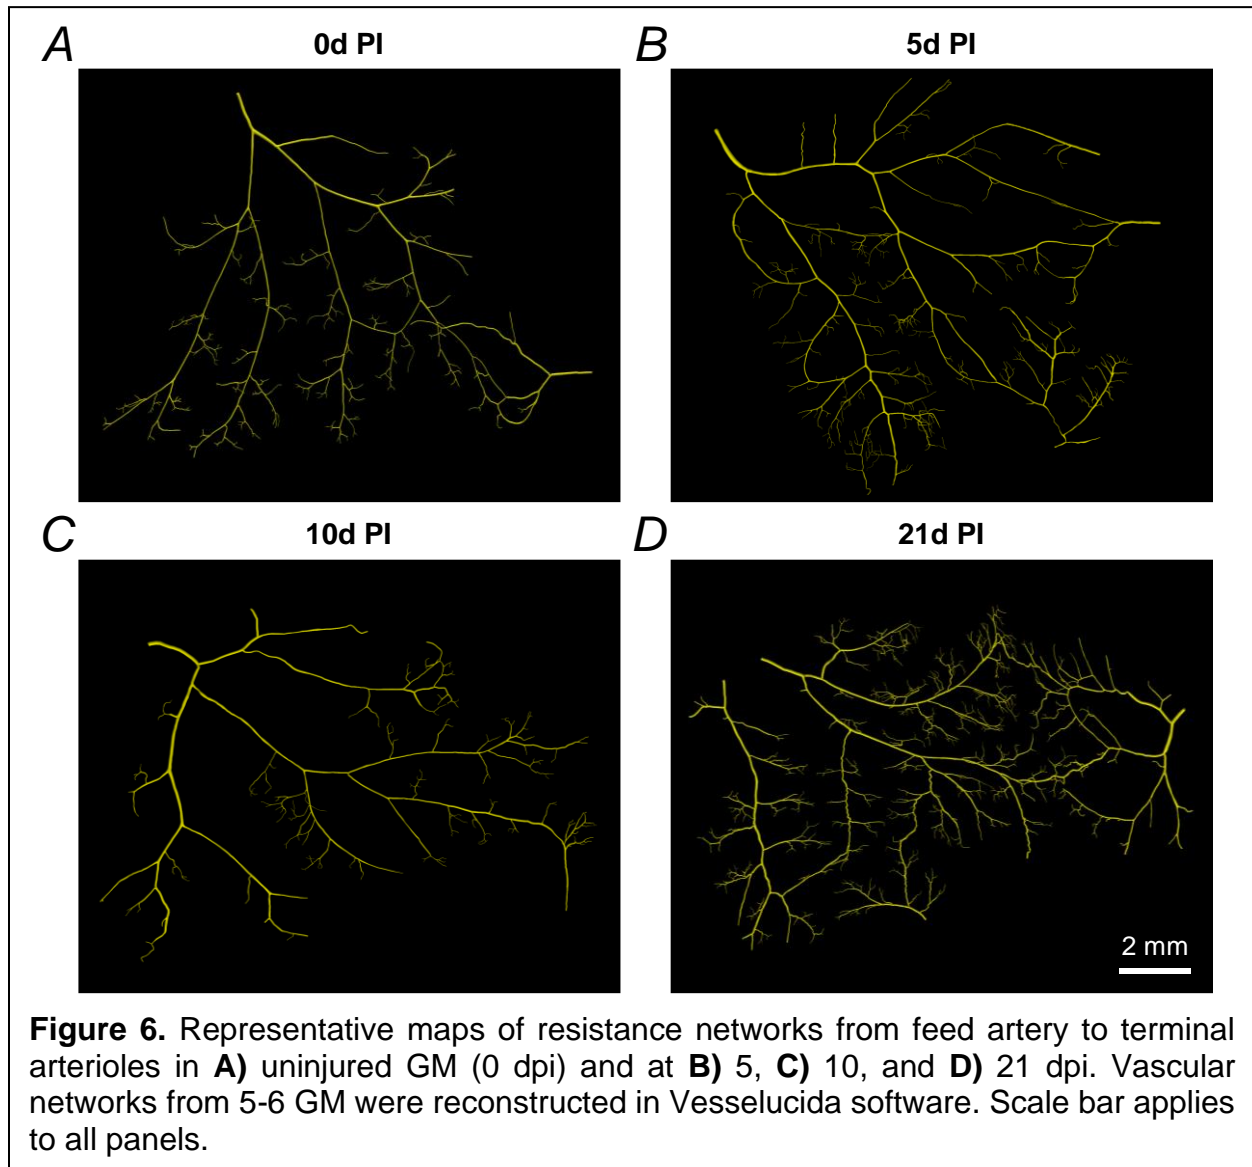

216

## 217 **Discussion**

218        Apart from myofibers, microvascular cells represent the largest cell population in  
219 healthy adult skeletal muscle (24). This relationship underscores the reliance of skeletal  
220 muscle on a robust microvascular supply to support the metabolic demands of myofibers.  
221 Because myofibers depend upon their microvascular supply for survival, understanding

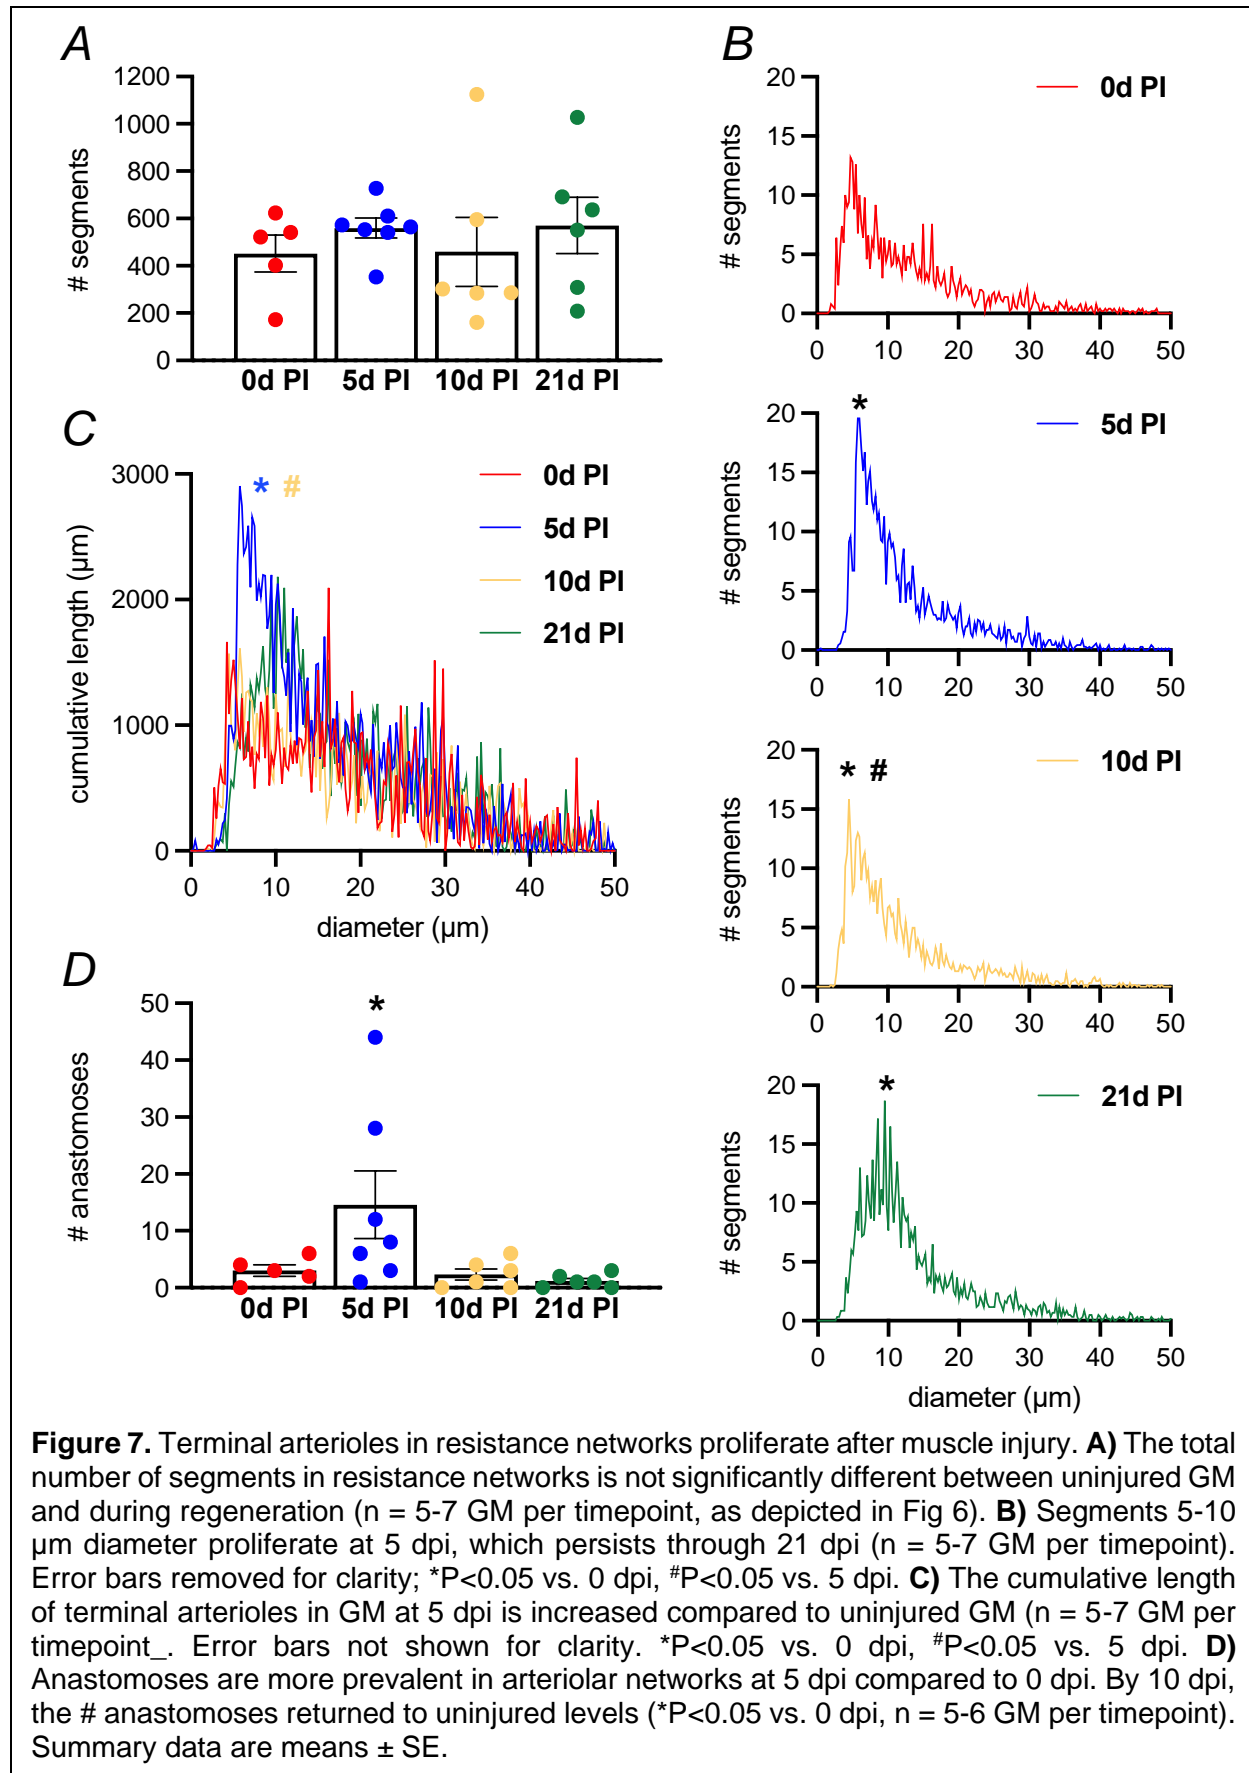



223 how microvascular cells respond after skeletal muscle injury and during regeneration is  
224 integral to the development of therapies targeted to promote muscle regeneration.

225

226 *Microvascular cell damage after muscle injury*

227 We showed that BaCl<sub>2</sub> induces depolarization of SMCs and ECs (Fig 1A & B),  
228 consistent with its action as a broad-spectrum K<sup>+</sup> channel inhibitor (25, 26). However, the  
229 consequences of such an effect differ between microvascular cells and myofibers. In  
230 myofibers, BaCl<sub>2</sub>-induced depolarization is accompanied by a rise in [Ca<sup>2+</sup>]<sub>i</sub> resulting in  
231 proteolysis, membrane disruption, and cell death within 1 h (8). Elevation of [Ca<sup>2+</sup>]<sub>i</sub> can  
232 increase mitochondrial Ca<sup>2+</sup> content to trigger cytochrome C release and intrinsic  
233 apoptosis (27). For SMCs exposed to the same conditions, membrane depolarization also  
234 increased [Ca<sup>2+</sup>]<sub>i</sub>, which led to vasoconstriction (Fig 1D), as seen in rabbit aorta (28).  
235 However, since cell death did not occur after the same duration of exposure (or even  
236 when extended to 3 h), the present findings indicate that either longer exposure to BaCl<sub>2</sub>  
237 is necessary (which is unlikely given the equal probability for BaCl<sub>2</sub> diffusion into both cell  
238 types) or that the rise in [Ca<sup>2+</sup>]<sub>i</sub> was not sufficient to induce SMC death. Finding negligible  
239 disruption of arteriolar or venular SMCs at 1 dpi (Fig 2) when myofibers have degenerated  
240 supports the latter explanation. We suggest that varying amounts of mitochondria,  
241 expression of different L-type Ca<sup>2+</sup> channel isoforms, the ability for the  
242 sarcoplasmic/endoplasmic reticulum to sequester Ca<sup>2+</sup> without dysfunction, or expression  
243 of pro-apoptotic proteins may explain the difference in cell death between myofibers and  
244 microvascular SMCs exposed to BaCl<sub>2</sub> (29, 30).

245           When recording from ECs in endothelial tubes, depolarization occurred without an  
246 increase in  $[Ca^{2+}]_i$  (Fig 1B & C), which is consistent with their lack of voltage operated  $Ca^{2+}$   
247 channels in the plasma membrane (13). Furthermore, no cell death was evident in  
248 endothelial tubes exposed to  $BaCl_2$  (Fig 1E). That ECs comprising capillaries are  
249 damaged following  $BaCl_2$  injection *in vivo* [Fig 3A, (7, 8)], but ECs directly exposed to  
250  $BaCl_2$  *in vitro* are not (Fig 1E), suggests that ECs in arteriolar and venular networks may  
251 be protected by SMCs *in vivo* and that the otherwise exposed capillary ECs are injured  
252 secondary to myofiber degeneration from  $BaCl_2$  exposure. Upon exposure to  $BaCl_2$ ,  
253 resting force of the mouse EDL muscle increases ~40% over 15 min, which then returns  
254 to baseline as proteolysis disrupts the integrity of contractile proteins (8). Given that  
255 evidence of capillary damage is not apparent during this time, the present data imply that  
256 skeletal muscle tissue degeneration induces capillary fragmentation hours after injury,  
257 rather than as a consequence of persistent myofiber contraction.

258           Within 1-2 h of damage by  $BaCl_2$  or physical trauma, skeletal muscle is invaded by  
259 neutrophils that generate pro-inflammatory cytokines, chemokines, and reactive oxygen  
260 species which exacerbate tissue damage (20). While neutrophil depletion prior to  $BaCl_2$   
261 injection did not prevent capillary damage at 1 dpi (Fig 3A & B), more capillaries remained  
262 perfused when compared to mice in which neutrophils were not depleted (Fig 3D). This  
263 outcome suggests that while neutrophil activity contributes to capillary damage, additional  
264 mechanisms lead to EC death when skeletal muscle is injured. Candidates include toxic  
265 substances released from degenerating myofibers, reactive oxygen species, calpain-  
266 dependent protein degradation, recruitment of proinflammatory cells including monocytes  
267 and macrophages (20, 31-34).

268 *Restoration of capillary networks during muscle regeneration*

269 Previous studies investigating capillarity during regeneration evaluated muscle  
270 cross sections (7, 35) and therefore cannot address the dynamics of microvascular  
271 network organization. Cross sections are inherently biased towards vessels oriented  
272 parallel to myofibers (36), which compromises the resolution of transverse microvessels  
273 and anastomoses. Moreover, studies that have examined the intact microcirculation  
274 during skeletal muscle regeneration have focused on hindlimb muscles such as the tibialis  
275 anterior (7) and EDL (10), which restricts observations to the superficial portion of the  
276 muscle due to the thickness of the tissue. While capillaries, terminal arterioles, and  
277 collecting venules can be observed, proximal resistance networks reside deeper in the  
278 muscle. To overcome these limitations, we evaluated microvascular regeneration in the  
279 GM, a thin, flat skeletal muscle well suited to high resolution imaging and analysis of entire  
280 microvascular networks (9).

281 Triggered by the release of such growth factors as VEGF, FGF, and IGF-1 from  
282 the hypoxic milieu (37), nascent capillaries sprout and elongate from surviving  
283 microvessel fragments at 2-3 dpi (7, 8). These regions of angiogenic activity within the  
284 tissue highlight the selective roles of individual ECs during angiogenesis. As shown during  
285 development, endothelial tip and stalk cells are selected after stimulation by VEGF and  
286 Notch signaling (38). Tip cells guide capillary sprouts as they sense attractive and  
287 repulsive signals in the microenvironment. Stalk cells trail tip cells and proliferate to  
288 elongate nascent capillaries such that by 5 dpi, capillary networks have reformed (Fig 4A)  
289 and perfusion is restored (9). While others have reported no change or even a reduction  
290 in the diameter of capillaries during the early stages of muscle regeneration (7), we

291 observed a ~30% increase in capillary diameter at 5 and 10 dpi (Fig 4B). Vasodilation is  
292 one of the earliest steps in both physiological and pathological angiogenesis (39). That  
293 resistance arterioles are also dilated at this time (9) suggests that regenerating skeletal  
294 muscle requires elevated blood flow afforded by a dilated microvasculature providing  
295 ample nutrients for cellular regeneration. Capillary dilation may reflect aberrant coverage  
296 by mural cells (pericytes) or dysregulated inter- and intracellular signaling (40-42).

297       Following injury of the GM, adjacent to sites of angiogenesis and regeneration are  
298 regions with extensive damage that are poorly perfused or avascular at 5 dpi, implying  
299 that microvascular regeneration after skeletal muscle injury is asynchronous between  
300 neighboring regions of tissue. Heterogeneity amongst ECs exists between vascular beds,  
301 microvessels, and even along the length of a single microvessel in healthy skeletal  
302 muscle (43, 44). Corresponding differences in gene expression and nuances in EC  
303 function may explain the asynchronous regenerative response of the microvasculature.  
304 In response to tissue hypoxia, angiogenesis occurs primarily in areas containing glycolytic  
305 (type II) myofibers (45, 46), suggesting that diffusion distances for O<sub>2</sub> and metabolites  
306 affect the angiogenic response. That the GM is a muscle comprised of mixed fiber type  
307 (47) is consistent with the observed heterogeneity in angiogenesis during regeneration of  
308 the GM.

309       In addition to the density of capillary networks, optimal distribution of capillaries is  
310 crucial for adequate muscle oxygenation. Heterogenous capillary spacing negatively  
311 impacts muscle oxygenation due to local increases in diffusion distances (48, 49).  
312 Microvascular structures resembling a developmental vascular plexus were present  
313 throughout the GM at 5 and 10 dpi (Fig 5B), with disorganized capillary networks

314 containing abnormal branching (e.g., trifurcations) and more segments that were not  
315 aligned with regenerating myofibers (Fig 5C). Similar abnormal microvascular  
316 morphogenesis has been described after grafting the hamster tibialis anterior muscle (50)  
317 or ischemic injury to mouse EDL muscle (10).

318 A microvascular unit constitutes a terminal arteriole and the group of capillaries it  
319 supplies (3). Following injury of the GM, the organization of capillaries into discernable  
320 MVUs apparent in uninjured muscle was not identifiable until 21 dpi (Fig 5D), the timepoint  
321 which coincides with the recovery of blood flow control in the resistance vasculature of  
322 the GM following BaCl<sub>2</sub> injury (9). In uninjured healthy skeletal muscle, terminal arterioles  
323 are oriented obliquely to myofibers, whereas capillaries primarily run parallel with  
324 myofibers. When a terminal arteriole constricts or dilates, flow through all capillaries it  
325 supplies diminishes or increases, respectively. We anticipated that nascent microvessels  
326 would repopulate residual basement membranes (51-54) following microvascular  
327 damage from skeletal muscle injury (7, 55). In contrast to the organization of MVUs in  
328 healthy muscle, regenerated microvascular networks were less aligned with myofibers,  
329 contained irregular structures, and required 21 dpi to approximate normal structure. This  
330 delay in reorganization implies that nascent capillaries did not regrow along basement  
331 membranes of old microvessels. We suggest that these structural abnormalities in  
332 capillary networks contribute to nonuniform perfusion during the early stages of myofiber  
333 regeneration. The persistence of arteriolar dilation during this time maintains capillary  
334 perfusion, which may help compensate for limitations imposed by aberrant capillary  
335 network organization.

336

337 *Remodeling of arteriolar networks during regeneration*

338           Muscle injury by BaCl<sub>2</sub> did not induce vascular cell death or structurally damage  
339 the resistance (or adjacent venular) network upstream from terminal arterioles (Fig 2).  
340 Evaluating network architecture during regeneration revealed an increase in the number  
341 of the smallest (i.e., terminal) arterioles 5-10 μm in diameter that persisted through 21 dpi  
342 (Fig 7B &C). A similar increase in small arterioles was observed after ischemic injury in  
343 the mouse spinotrapezius muscle after arterial ligation (56). We also observed an  
344 increase in the number of anastomoses in arteriolar networks at 5 dpi (Fig 7D). These  
345 direct connections ensure redundancy in blood flow paths to limit underperfusion in  
346 addition to promoting the maximum delivery and removal of blood to regenerating tissue  
347 before local blood flow control recovers. While the origin of new arterioles in  
348 microvascular networks during regeneration remains incompletely understood, nascent  
349 capillaries may become “arterialized” by recruiting mural cells (57). Together, the data  
350 suggest that the repair, recovery, and maintenance of new myofibers requires a robust  
351 supply of oxygen and nutrients from the regenerating microcirculation preceding the  
352 recovery of blood flow regulation.

353

354 *Conclusion*

355           Skeletal muscle is highly vascularized. Capillaries are located parallel to and in  
356 close association with myofibers, providing oxygen and nutrients while removing  
357 metabolic byproducts. The present study shows that capillaries, but not SMCs or ECs of  
358 larger microvessels, are disrupted by the microenvironment created by degenerating  
359 myofibers. When perfusion is restored, nascent capillary networks are dilated,

360 disorganized, and associated with more terminal arterioles. These early morphological  
361 adaptations may compensate for lack of blood flow regulation during myofiber  
362 regeneration (9). Reorganization of capillaries and terminal arterioles into MVUs at 21 dpi  
363 coincides with restoration of the number myofibers, their cross-sectional area, and the  
364 recovery of blood flow regulation in resistance networks. Understanding how  
365 microvascular structure and function are restored following skeletal muscle injury  
366 provides new insight for developing therapeutic interventions for the treatment of acute  
367 muscle trauma in the adult.

368

## 369 **Materials and Methods**

### 370 *Ethical approval*

371 All procedures were approved by the Animal Care and Use Committee at the  
372 University of Missouri (protocol #10050) and were performed in accordance with the  
373 National Research Council's Guide for the Care and Use of Laboratory Animals and the  
374 animal ethics checklist of this journal.

375

### 376 *Animal care and use*

377 Male C57Bl/6J mice were purchased from Jackson Laboratory (Bar Harbor, ME,  
378 USA) at ~14 weeks of age and acclimated at the University of Missouri animal care  
379 facilities at least 1 week prior to study. Male Cdh5-mTmG mice [cross of VE-cadherin-  
380 CreERT2 mice (21) (gifted from Dr. Luisa Iruela-Arispe) and Rosa26-mTmG mice  
381 (#007676, Jackson Laboratory); both on C57BL/6 background] were bred and housed in  
382 animal care facilities of the University of Missouri. Mice were studied at ~4 months of age.

383 Cre recombination for membrane-bound eGFP expression in ECs was induced through  
384 intraperitoneal injection of 100 µg tamoxifen (1 mg/100 µL in peanut oil; #T5648, Sigma-  
385 Aldrich; St. Louis, MO, USA) on 3 consecutive days with at least 1 week allowed after the  
386 first injection prior to study. All mice were maintained under a 12:12 h light/dark cycle at  
387 22-24°C with fresh food and water *ad libitum*. To control for an order effect, criterion time  
388 points and treatment status were randomized.

389

### 390 *Preparation of isolated microvessels and endothelial tubes*

391 On the morning of an experiment, a male C57Bl/6J mouse was anesthetized  
392 [ketamine (100 mg/kg) + xylazine (10 mg/kg) in sterile saline; intraperitoneal injection],  
393 abdominal fur was shaved, and a midline incision through the skin was made from the  
394 sternum to the pubis. The abdominal muscles were exposed, removed bilaterally, and  
395 placed in a dissection chamber containing chilled, nominally Ca<sup>2+</sup> free physiological salt  
396 solution (PSS, pH 7.4) containing (in mM): 140 NaCl (Fisher Scientific; Pittsburgh, PA,  
397 USA), 5 KCl (Fisher), 1 MgCl<sub>2</sub> (Sigma), 10 HEPES (Sigma), and 10 glucose (Fisher);  
398 standard PSS also contained 2 mM CaCl<sub>2</sub> (Fisher). Muscles were pinned as a flat sheet  
399 onto transparent silicone rubber (Sylgard 184; Dow Corning; Midland, MI, USA). While  
400 viewing through a stereomicroscope, an unbranched segment of the superior epigastric  
401 artery [SEA; length, ~2 mm; diameter, ~150 µm; comprised of a single smooth muscle  
402 cell (SMC) layer surrounding the endothelial cell (EC) monolayer] was dissected from the  
403 surrounding tissue. Following isolation, an SEA was transferred to a tissue chamber  
404 (#RC27-N; Warner Instruments; Hamden, CT) for cannulation. The tissue chamber was  
405 secured in a platform with micromanipulators (MT-XYZ; Siskiyou Corp; Grants Pass, OR,



406 USA) positioned at each end that held heat-polished cannulation micropipettes (external  
407 diameter, ~100  $\mu\text{m}$ ). The SEA was cannulated at each end and secured with suture. The  
408 vessel preparation was transferred to the stage of a Nikon E600FN microscope (Tokyo,  
409 Japan) mounted on a vibration isolation table (TMC Vibration Control; Peabody, MA,  
410 USA). The vessel was pressurized to 100 cm H<sub>2</sub>O (~75 mmHg), maintained at 37°C,  
411 superfused at 3 mL/min with standard PSS, and allowed to equilibrate for 15 min before  
412 experimentation.

413 To isolate intact endothelial tubes, an SEA segment (length, ~1 mm, diameter, ~60  
414  $\mu\text{m}$ ) was placed into a round bottom test tube containing 0.62 mg/mL papain (#P4762,  
415 Sigma), 1 mg/mL dithioerythritol (#D8255, Sigma), and 1.5 mg/mL collagenase (#C8051,  
416 Sigma) in PSS and incubated for 30 min at 34°C (11). The vessel segment was  
417 transferred to the tissue chamber and gently triturated to remove the SMCs by aspirating  
418 and ejecting the segment through borosilicate glass capillary tubes that were heat  
419 polished at one end (tip internal diameter, ~80  $\mu\text{m}$ ). Following dissociation of SMCs  
420 (confirmed by visual inspection at 200X magnification), the endothelial tube was secured  
421 against the bottom of the chamber with blunt fire-polished micropipettes held in the  
422 micromanipulators. The preparation was secured on an inverted microscope (#TS100,  
423 Nikon) mounted on a vibration isolation table (TMC Vibration Control; Peabody, MA,  
424 USA). The endothelial tube was maintained at 33°C, superfused at 3 mL/min with  
425 standard PSS, and equilibrated for 15 min before experimentation.

426

427 *Intracellular recording*

428 Membrane potential ( $V_m$ ) of SMCs (intact pressurized SEA) or ECs (freshly  
429 isolated endothelial tube) was recorded with an Axoclamp amplifier (2B; Molecular  
430 Devices; Sunnyvale, CA, USA) using micropipettes pulled (P-97; Sutter) from glass  
431 capillary tubes (#GC100F-10; Warner; Hamden, CT, USA) and backfilled with 2 M KCl  
432 (tip resistance,  $\sim 150$  M $\Omega$ ). A Ag/AgCl pellet was placed in effluent standard PSS for the  
433 reference electrode. The output of the amplifier was connected to a data acquisition  
434 system (Digidata 1322A; Molecular Devices) and an audible baseline monitor (ABM-3;  
435 World Precision Instruments; Sarasota, FL, USA). Data were recorded at 1000 Hz using  
436 Axoscope 10.1 software (Molecular Devices) on a personal computer. Successful  
437 impalements were indicated by sharp negative deflection of  $V_m$ , stable  $V_m > 1$  min, and  
438 prompt return to 0 mV upon withdrawal of the electrode. Once a cell was impaled,  $V_m$  was  
439 recorded for at least 5 min to establish a stable baseline. The superfusion solution was  
440 then changed to PSS containing 1.2% BaCl<sub>2</sub> until the  $V_m$  response had stabilized ( $\sim 10$   
441 min). Each experiment represents paired data under resting baseline conditions and  
442 when stabilized during with BaCl<sub>2</sub> treatment for an intact vessel (SMCs) or endothelial  
443 tube (ECs) from a separate mouse.

444

#### 445 *Calcium photometry*

446 A cannulated, pressurized SEA was secured in a tissue chamber and placed on  
447 an inverted microscope. The vessel was superfused (3 mL/min) at 37°C for 20 min with  
448 standard PSS, then incubated in a static bath containing fura 2-AM dye (#F14185,  
449 Fisher). The dye was dissolved in DMSO, diluted to 1  $\mu$ M in standard PSS, and added to  
450 the tissue chamber for 40 min. Superfusion with standard PSS was then resumed for 20

451 min to wash out excess dye. Fura 2 fluorescence was used to evaluate  $[Ca^{2+}]_i$  by  
452 alternatively exciting the preparation at 340 nm and 380 nm while recording emissions at  
453 510 nm through a 20X objective [Nikon Fluor20, numerical aperture (NA) = 0.45] using  
454 IonWizard 6.3 software (IonOptix, Milford, MA). After fluorescence and vessel diameter  
455 were recorded under baseline conditions, 1.2%  $BaCl_2$  was added to the superfusion  
456 solution. Intracellular  $Ca^{2+}$  signals and vessel diameter were measured over 30 min of  
457  $BaCl_2$  exposure. Under these conditions (dye loaded from the bath), the  $[Ca^{2+}]_i$  signal  
458 primarily originates from SMCs (16).

459 To measure  $[Ca^{2+}]_i$  in ECs, an endothelial tube was incubated for 30 min with fura  
460 2-AM dye in a static bath and then washed for 20 min with standard PSS. To maintain  
461 their integrity, these preparations were studied at 33°C (58). After baseline fluorescence  
462 was recorded,  $Ca^{2+}$  signals ( $F_{340}/F_{380}$ ) were measured during 30 min of exposure to 1.2%  
463  $BaCl_2$  in standard PSS; responses typically stabilized within ~10 min.

464 Each experiment represents paired data under resting baseline conditions and  
465 during stabilization of the response to  $BaCl_2$  treatment for an intact vessel or endothelial  
466 tube from a separate mouse.

467

#### 468 *Cell death*

469 Following equilibration in standard PSS, the superfusion solution was changed to  
470 PSS containing 1.2%  $BaCl_2$ . After preparations were exposed to  $BaCl_2$  for 1 h [which kills  
471 >90% myofibers, (8)], superfusion with standard PSS was restored. The membrane  
472 permeant nuclear dye Hoechst 33342 (1  $\mu$ M; #H1399, Fisher) was used to identify nuclei  
473 of all cells and propidium iodide (2  $\mu$ M, #P4170, Sigma) to identify nuclei in dead and

474 dying cells (14, 15). Following BaCl<sub>2</sub> exposure, respective nuclear dyes (in standard PSS)  
475 were perfused through the lumen of a cannulated SEA (0.1 mL/min) or superfused over  
476 the surface of an endothelial tube for 10 min followed by 10 min wash in standard PSS.

477 To evaluate cell death (14), fluorescent images of nuclear staining with Hoechst  
478 33342 and propidium iodide were acquired with appropriate filters using a 40X water  
479 immersion objective (NA = 0.8) coupled to a DS-Qi2 camera with Elements software  
480 (version 4.51) on an E800 microscope (Nikon). Z-stacks were acquired from the top half  
481 of the vessel segment and analyzed using ImageJ software. Stained nuclei were counted  
482 manually within a defined region of interest (150 x 500 μm in intact microvessels, 50 x  
483 300 μm in endothelial tubes); nuclei of ECs are oval shaped and oriented parallel to the  
484 vessel axis while SMC nuclei are thin and oriented perpendicular to the vessel axis (14).  
485 For each cell type, cell death is expressed as a percentage as follows: (# propidium  
486 iodide<sup>+</sup> nuclei / # Hoechst 33342<sup>+</sup> nuclei) x 100.

487

#### 488 *Muscle injury by local injection of BaCl<sub>2</sub>*

489 A mouse was anesthetized with ketamine + xylazine and rested on an aluminum  
490 warming plate to maintain body temperature. The skin over the injury site was shaved  
491 and sterilized by wiping with Betadine Solution (Purdue Products LP; Stamford, CT, USA)  
492 followed by 70% alcohol. An incision (~5 mm) was made through the skin to expose the  
493 gluteus maximus muscle (GM) near the lumbar fascia. Using a Hamilton syringe and 32  
494 gauge needle (Reno, NV, USA), 75 μL of 1.2% BaCl<sub>2</sub> in water was injected under the GM  
495 to injure the muscle (9). The incision was closed with surgical glue or two discontinuous  
496 sutures. The mouse was placed on a heated platform, monitored until consciousness and

497 ambulation were restored, then returned to its original cage. Mice routinely recovered  
498 normal activity and behavior within 24 h and were studied up to 21 dpi with uninjured mice  
499 (0 dpi) serving as controls. The 21 dpi time point coincides with recovery of vasomotor  
500 control in arteriolar networks and restoration of myofiber number during regeneration of  
501 the mouse GM following BaCl<sub>2</sub> injury (9).

502

### 503 *Neutrophil depletion*

504 Inflammation is integral to muscle injury (20). In some experiments, neutrophils  
505 were depleted prior to BaCl<sub>2</sub> injection using a neutralizing Ly6G antibody. Mice were  
506 injected intraperitoneally with either 500 µg of anti-Ly6G 1A8 antibody [#BE0075,  
507 BioxCell; Lebanon, NH, USA; (59)] or vehicle (sterile saline) on -2, -1, and 0 dpi.  
508 Neutrophil depletion was confirmed by a differential blood count of a sample collected by  
509 cardiac puncture in mice anesthetized with ketamine + xylazine. A drop of whole blood  
510 was spread on a glass slide and stained with a Wright Giemsa stain. Leukocytes were  
511 counted in sets of 100 cells, differentiating between lymphocytes, neutrophils, and  
512 monocytes. Two sets of 100 counts were averaged per slide. Blood samples were  
513 obtained from mice without muscle injury (0 dpi) and at 1 dpi and compared to mice  
514 injected with the vehicle at the same time points.

515

### 516 *Dissection of gluteus maximus muscle*

517 A mouse was anesthetized with ketamine + xylazine as above. Supplemental  
518 doses (~20% of initial dose) were given (intraperitoneal injection) throughout the  
519 experimental protocol (typically lasting 2-3 h) to maintain a stable plane of anesthesia

520 (checked every 15 minutes by lack of withdrawal to tail or toe pinch). Hair was removed  
521 by shaving and the mouse was placed on a warming plate. As previously described (60),  
522 skin and connective tissue overlying the GM were removed using microdissection to  
523 expose the GM. Once exposed, the GM was continuously superfused with a bicarbonate-  
524 buffered physiological salt solution (bb-PSS; pH 7.4, 34-35°C) containing (in mM) 131.9  
525 NaCl<sub>2</sub> (Fisher), 4.7 KCl (Fisher), 2 CaCl<sub>2</sub> (Sigma), 1.17 MgSO<sub>4</sub> (Sigma), and 18 NaHCO<sub>3</sub>  
526 (Sigma) equilibrated with 5% CO<sub>2</sub>/95% N<sub>2</sub>. While viewing through a stereomicroscope,  
527 the GM was cut along its origin from the lumbar fascia, sacrum, and iliac crest to reflect  
528 the muscle away from the body and reveal its vascular supply on the ventral side. The  
529 muscle was then either removed for immunostaining or prepared for intravital microscopy  
530 as described below.

531

#### 532 *Whole mount immunostaining for confocal imaging*

533 The GM from C57BL/6J mice was excised, placed in ice-cold phosphate buffered  
534 saline (PBS, pH 7.4; #P3813, Sigma) and placed onto transparent rubber coated 12 well  
535 plate. The muscle was spread to approximate its dimensions *in situ* with the ventral  
536 surface facing up and secured at the edges with insect pins. Excessive connective tissue  
537 and fat were removed using microdissection. The GM was fixed overnight at 4°C in 4%  
538 paraformaldehyde in PBS. After washing in PBS (3 x 5 min), the muscle was immersed  
539 in blocking buffer containing 0.5% Triton x-100 (#T8787, Sigma), 2% bovine serum  
540 albumin (#BP671; Fisher), and 4% normal goat serum (#50197Z, Sigma) in PBS. To  
541 identify SMCs, the GM was stained with monoclonal rabbit anti-Myh11 [1:500;  
542 #ab124679; Abcam, Cambridge, UK; (61)] in blocking buffer overnight at 4°C, then

543 washed with blocking buffer (3 x 5 min), incubated with goat anti-rabbit Alexa 633 (1:200;  
544 #A21071, Fisher) in blocking buffer for 2 h at room temperature, and washed in PBS (3 x  
545 10 min).

546 An immunostained GM was placed in a custom imaging chamber with the ventral  
547 surface facing the objective to optimize resolution of the microvasculature. A small volume  
548 of PBS (<10  $\mu$ L) was added to the chamber and the GM was flattened by placing a glass  
549 block (2 cm x 2.5 cm x 1 cm; mass, 7.8 g) on the dorsal surface. Images of the  
550 microvasculature were acquired with a 10X objective (NA = 0.4; image size, 1162.5  $\mu$ m x  
551 1162.5  $\mu$ m) or 25X water immersion objective (NA = 0.95; image size, 465  $\mu$ m x 465  $\mu$ m)  
552 on a laser scanning confocal microscope (TCS SP8, Leica Microsystems; Buffalo Grove,  
553 IL) using Leica LASX software. Images were digitally rotated such that myofibers were  
554 aligned vertically for analysis of capillary orientation. Maximum projection z-stacks (z-  
555 step, 2  $\mu$ m; ~150  $\mu$ m thick) were used to resolve SMC coverage and capillary network  
556 morphology (n = 4-5 mice, 5-12 images across mice).

557

#### 558 *Analysis of capillary diameter and network morphology*

559 Male Cdh5-mTmG mice expressing green fluorescent protein (eGFP) in ECs were  
560 used to analyze capillary diameters and network morphology during regeneration. The  
561 GM was excised, cleaned, and imaged as described above, but without prior fixation. To  
562 measure the average diameter of capillaries from confocal z-stacks (image size, 465  $\mu$ m  
563 x 465  $\mu$ m), a calibrated 5x5 grid was centered over the image, creating 25 equal ROIs  
564 (93  $\mu$ m x 93  $\mu$ m). The diameter of 5 capillaries were measured manually from 10 of 25  
565 ROIs selected at random; these 50 measurements were averaged for the image with 2-3

566 images analyzed per muscle from 4-6 mice. To analyze capillary network morphology  
567 using ImageJ, a threshold was applied to maximum projections of z-stacks to generate a  
568 binary image. The % vascular area (area fraction) was calculated by determining the area  
569 occupied by eGFP fluorescence within the entire image (465  $\mu\text{m}$  x 465  $\mu\text{m}$ ).

570 To assess capillary network morphology from a larger field of view (1162.5  $\mu\text{m}$  x  
571 1162.5  $\mu\text{m}$ ), the binary image was skeletonized and analyzed with the Analyze Skeleton  
572 plugin (ImageJ). Outputs included: # segments, length of segments, # connected  
573 segments, and # branch points. Segments included in this analysis contained at least 3  
574 continuous pixels, which corresponded to  $\sim 2.5$   $\mu\text{m}$ .

575 To calculate the continuous capillary length as a measure of fragmentation at 1  
576 dpi, the length of connected segments was summed for each network, defined as a group  
577 of connected capillaries, and the maximum continuous capillary length determined for a  
578 single image (465  $\mu\text{m}$  x 465  $\mu\text{m}$ ); the mean  $\pm$  SE of all images (n = 4-8 images from 4  
579 mice) are reported. Branch point frequency was calculated as the number of branch  
580 points per total microvascular length (mm) for a given image. The OrientationJ plugin  
581 generated distribution histograms for capillary orientation analysis with  $-90^\circ$  and  $+90^\circ$  on  
582 the horizontal axis. All measurements in ImageJ were validated using reference networks  
583 created with known area, length, number of branch points, and orientation.

584

### 585 *Intravital microscopy*

586 The GM of anesthetized C57BL/6J mice was dissected as described above, then  
587 spread onto a transparent rubber pedestal and pinned at its edges to approximate *in situ*  
588 dimensions (9, 60). The preparation was transferred to the stage of a Nikon E600FN



589 microscope and equilibrated for 30 min while continuously superfused with bb-PSS at 3  
590 mL/min maintained at 34-35°C (pH, 7.4). To assess vascular perfusion and permeability  
591 during maximum capillary damage (1 dpi), a fluorescein isothiocyanate (FITC) conjugated  
592 dextran (70 kDa, to approximate the mass of albumin) was injected into the retro-orbital  
593 sinus to access the systemic circulation and allowed to circulate for ~10 min. The  
594 preparation was illuminated by a mercury lamp for fluorescence imaging using  
595 appropriate filters. Images were acquired through a 4X objective (Nikon Fluor4; NA = 0.1;  
596 image size, 2.7 mm x 3.4 mm) coupled to a low light CMOS FP-Lucy camera (Stanford  
597 Photonics; Palo Alto, CA, USA) and displayed on a digital monitor. Time lapse images  
598 were recorded at 40 frames/s using Piper Control software (Stanford Photonics). At the  
599 end of the experiment, the mouse was given an overdose of anesthetic and killed by  
600 cervical dislocation.

601

### 602 *Mapping arteriolar networks*

603 In anesthetized mice, wheat germ agglutinin conjugated to Alexa Fluor 647 (WGA-  
604 647, 1 mg/mL, 200 µL; #W32466, Fisher) was injected into the retroorbital sinus to access  
605 the systemic circulation and label the endothelial glycocalyx. The WGA-647 distributed  
606 throughout the vascular compartment for 10 min. Thereafter, the GM was dissected,  
607 cleaned, and secured with pins as above. The GM was fixed overnight at 4°C (4%  
608 paraformaldehyde in PBS) avoiding direct light. Tissues were washed in PBS, cleared in  
609 100% glycerol overnight at 4°C, then rinsed in PBS, mounted onto a slide, and  
610 coverslipped.

611 Whole mount GM preparations were viewed using a Nikon Eclipse 600 microscope  
612 with a Nikon Plan Fluor 10X objective (NA 0.3) coupled to a CMOS camera (Orca Flash  
613 4.0; Hamamatsu) and personal computer. The XYZ translational stage (Ludl Electronic,  
614 Hawthorne, NY, USA) was controlled by stepper motors coupled to an integrated joystick  
615 for constant repositioning of the tissue during imaging. The tracing icon was adjusted by  
616 the operator to match vessel diameter; spatial resolution was  $< 2 \mu\text{m}$ . This strategy is  
617 similar to that used in aged mice (60). A grid slide (MBF Bioscience; Williston, VT) was  
618 used for parcentric and parfocal calibration when linking the hardware with the software.  
619 A stage micrometer (100 X 0.01 = 1 mm; Graticules Ltd, Tonbridge Kent, UK) validated  
620 the calibration.

621

### 622 *3D reconstruction and analysis of resistance networks*

623 Vesselucida Microscope Edition software (MBF Bioscience) was used to trace  
624 entire resistance networks in the GM, from the inferior gluteal (feed) artery to terminal  
625 arterioles. Some tracings contained collateral branches to the resistance network fed by  
626 the superior gluteal artery. Occasionally, in thicker regions of the GM, reduced visibility  
627 resulted in discontinuous or incomplete networks, which were not used in the present  
628 analyses. Furthermore, for criterion data, networks containing fewer than 100 vessel  
629 segments in the completed tracing were excluded from analyses. Vesselucida Explorer  
630 software (MBF Bioscience) was used to calculate # segments, diameter, length, and # of  
631 anastomoses in each tracing. To generate summary histograms across GM preparations  
632 during regeneration, segments were binned into diameter increments of  $1 \mu\text{m}$ ; for

633 cumulative length, those within each bin were summed. Anastomoses were defined as  
634 the shortest length to return to a given branch point.

635

### 636 *Statistics*

637 Statistical analyses were performed using Prism 9 software (GraphPad Software  
638 Inc., La Jolla, CA, USA). For *in vitro* experiments of isolated vessel preparations,  $V_m$ ,  
639  $[Ca^{2+}]_i$ , and diameter were analyzed with a paired two-tailed Student's t-test. For capillary  
640 network morphology, variables evaluated during regeneration were analyzed by 1-way  
641 ANOVA and Tukey's multiple comparisons post-hoc test. Frequency distributions for  
642 dimensions of resistance networks were analyzed with a Kolmogorov-Smirnov test.  $P <$   
643 0.05 was considered statistically significant. Values for n given in figure captions refer to  
644 the number of vessels or images evaluated from 4-6 mice.

645

### 646 **Acknowledgements**

647 The authors thank Dr. Robert Arpke for performing tamoxifen injections for Cdh5-  
648 mTmG mice. Dr. Erika Boerman provided use of her confocal microscope for imaging  
649 capillary network morphology. Dr. Susan Tappan and Timothy Tetreault at MBF  
650 Bioscience provided expert technical assistance with applying Vesselucida software to  
651 our analyses of arteriolar networks.

652

### 653 **Additional Information**

#### 654 *Competing interests*

655 The authors declare that no competing interests exist.

656 *Funding*

| <b>Funder</b>                              | <b>Grant reference number</b>                   | <b>Author</b>      |
|--------------------------------------------|-------------------------------------------------|--------------------|
| University of Missouri, School of Medicine | Margaret Proctor Mulligan Endowed Professorship | Steven S. Segal    |
|                                            | Margaret Proctor Mulligan Fellowship            | Nicole L. Jacobsen |
| University of Missouri, School of Medicine | Development Award                               | Steven S. Segal    |
| National Institutes of Health              | R37 HL-041026                                   | Steven S. Segal    |
| National Institutes of Health              | F32 HL-152558                                   | Nicole L. Jacobsen |
| National Institutes of Health              | R01 AR-067450                                   | DDW Cornelison     |

The funders had no role in study design, data collection and interpretation, or the decision to submit the work for publication.

657

658 *Author Contributions*

659 NL Jacobsen: Conceptualization, Data Curation, Formal Analysis, Validation,  
660 Investigation, Methodology, Funding Acquisition, Writing-original draft, Writing-review  
661 and editing; CN Norton: Data Curation, Formal Analysis, Validation, Investigation,  
662 Methodology, Writing-review and editing; RL Shaw: Data Curation, Investigation,  
663 Methodology, Writing-review and editing; DDW Cornelison: Conceptualization,  
664 Supervision, Funding Acquisition, Resources, Writing-review and editing; SS Segal:  
665 Conceptualization, Data Curation, Supervision, Methodology, Funding Acquisition,  
666 Resources, Writing-review and editing, Project Administration.

667 **References**

- 668 1. **Yin H, Price F, and Rudnicki MA.** Satellite cells and the muscle stem cell niche.  
669 *Physiol Rev* 93: 23-67, 2013.
- 670 2. **Karalaki M, Fili S, Philippou A, and Koutsilieris M.** Muscle regeneration: cellular  
671 and molecular events. *In Vivo* 23: 779-796, 2009.
- 672 3. **Segal SS.** Regulation of blood flow in the microcirculation. *Microcirculation* 12: 33-  
673 45, 2005.
- 674 4. **Segal SS and Duling BR.** Communication between feed arteries and  
675 microvessels in hamster striated muscle: Segmental vascular responses are functionally  
676 coordinated. *Circ Res* 59: 283-290, 1986.
- 677 5. **Olfert IM, Breen EC, Mathieu-Costello O, and Wagner PD.** Skeletal muscle  
678 capillarity and angiogenic mRNA levels after exercise training in normoxia and chronic  
679 hypoxia. *J Appl Physiol (1985)* 91: 1176-1184, 2001.
- 680 6. **Peirce SM and Skalak TC.** Microvascular remodeling: a complex continuum  
681 spanning angiogenesis to arteriogenesis. *Microcirculation* 10: 99-111, 2003.
- 682 7. **Hardy D, Besnard A, Latil M, Jouvion G, Briand D, Thepenier C, Pascal Q,**  
683 **Guguin A, Gayraud-Morel B, Cavaillon JM, Tajbakhsh S, Rocheteau P, and Chretien**  
684 **F.** Comparative study of injury models for studying muscle regeneration in mice. *PLoS*  
685 *One* 11: e0147198, 2016.
- 686 8. **Morton AB, Norton CE, Jacobsen NL, Fernando CA, Cornelison DDW, and**  
687 **Segal SS.** Barium chloride injures myofibers through calcium-induced proteolysis with  
688 fragmentation of motor nerves and microvessels. *Skelet Muscle* 9: 27, 2019.

- 689 9. **Fernando CA, Pangan AM, Cornelison D, and Segal SS.** Recovery of blood flow  
690 regulation in microvascular resistance networks during regeneration of mouse gluteus  
691 maximus muscle. *J Physiol* 597: 1401-1417, 2019.
- 692 10. **Arpino JM, Nong Z, Li F, Yin H, Ghonaim N, Milkovich S, Balint B, O'Neil C,**  
693 **Fraser GM, Goldman D, Ellis CG, and Pickering JG.** Four-dimensional microvascular  
694 analysis reveals that regenerative angiogenesis in ischemic muscle produces a flawed  
695 microcirculation. *Circ Res* 120: 1453-1465, 2017.
- 696 11. **Socha MJ and Segal SS.** Isolation of microvascular endothelial tubes from mouse  
697 resistance arteries. *J Vis Exp*: e50759, 2013.
- 698 12. **Lipscombe D, Helton TD, and Xu W.** L-type calcium channels: the low down. *J*  
699 *Neurophysiol* 92: 2633-2641, 2004.
- 700 13. **Moccia F, Berra-Romani R, and Tanzi F.** Update on vascular endothelial Ca<sup>(2+)</sup>  
701 signalling: A tale of ion channels, pumps and transporters. *World J Biol Chem* 3: 127-158,  
702 2012.
- 703 14. **Norton CE, Sinkler SY, Jacobsen NL, and Segal SS.** Advanced age protects  
704 resistance arteries of mouse skeletal muscle from oxidative stress through attenuating  
705 apoptosis induced by hydrogen peroxide. *J Physiol* 597: 3801-3816, 2019.
- 706 15. **Norton CE, Jacobsen NL, Sinkler SY, Manrique-Acevedo C, and Segal SS.**  
707 Female sex and Western-style diet protect mouse resistance arteries during acute  
708 oxidative stress. *Am J Physiol Cell Physiol* 318: C627-C639, 2020.
- 709 16. **Norton CE and Segal SS.** Calcitonin gene-related peptide hyperpolarizes mouse  
710 pulmonary artery endothelial tubes through K(ATP) channel activation. *Am J Physiol Lung*  
711 *Cell Mol Physiol* 315: L212-L226, 2018.

- 712 17. **Babu GJ, Warshaw DM, and Periasamy M.** Smooth muscle myosin heavy chain  
713 isoforms and their role in muscle physiology. *Microsc Res Tech* 50: 532-540, 2000.
- 714 18. **Miano JM, Cserjesi P, Ligon KL, Periasamy M, and Olson EN.** Smooth muscle  
715 myosin heavy chain exclusively marks the smooth muscle lineage during mouse  
716 embryogenesis. *Circ Res* 75: 803-812, 1994.
- 717 19. **Fielding RA, Manfredi TJ, Ding W, Fiatarone MA, Evans WJ, and Cannon JG.**  
718 Acute phase response in exercise. III. Neutrophil and IL-1 beta accumulation in skeletal  
719 muscle. *Am J Physiol Regul Integr Comp Physiol* 265: R166-R172, 1993.
- 720 20. **Tidball JG.** Regulation of muscle growth and regeneration by the immune system.  
721 *Nature Reviews Immunology* 17: 165-178, 2017.
- 722 21. **Wang Y, Nakayama M, Pitulescu ME, Schmidt TS, Bochenek ML, Sakakibara**  
723 **A, Adams S, Davy A, Deutsch U, Luthi U, Barberis A, Benjamin LE, Mäkinen T,**  
724 **Nobes CD, and Adams RH.** Ephrin-B2 controls VEGF-induced angiogenesis and  
725 lymphangiogenesis. *Nature* 465: 483-486, 2010.
- 726 22. **Risau W and Flamme I.** Vasculogenesis. *Annu Rev Cell Dev Biol* 11: 73-91, 1995.
- 727 23. **Emerson GG and Segal SS.** Alignment of microvascular units along skeletal  
728 muscle fibers of hamster retractor. *J Appl Physiol* 82: 42-48, 1997.
- 729 24. **Rubenstein AB, Smith GR, Raue U, Begue G, Minchev K, Ruf-Zamojski F, Nair**  
730 **VD, Wang X, Zhou L, Zaslavsky E, Trappe TA, Trappe S, and Sealfon SC.** Single-cell  
731 transcriptional profiles in human skeletal muscle. *Scientific Reports* 10: 229, 2020.
- 732 25. **Bonev AD and Nelson MT.** ATP-sensitive potassium channels in smooth muscle  
733 cells from guinea pig urinary bladder. *Am J Physiol* 264: C1190-C1200, 1993.

- 734 26. **Nelson MT and Quayle JM.** Physiological roles and properties of potassium  
735 channels in arterial smooth muscle. *Am J Physiol* 268: C799-C822, 1995.
- 736 27. **Pinton P, Giorgi C, Siviero R, Zecchini E, and Rizzuto R.** Calcium and  
737 apoptosis: ER-mitochondria Ca<sup>2+</sup> transfer in the control of apoptosis. *Oncogene* 27: 6407-  
738 6418, 2008.
- 739 28. **Karaki H, Satake N, and Shibata S.** Mechanism of barium-induced contraction in  
740 the vascular smooth muscle of rabbit aorta. *Br J Pharmacol* 88: 821-826, 1986.
- 741 29. **Park SY, Gifford JR, Andtbacka RH, Trinity JD, Hyingstrom JR, Garten RS,**  
742 **Diakos NA, Ives SJ, Dela F, Larsen S, Drakos S, and Richardson RS.** Cardiac,  
743 skeletal, and smooth muscle mitochondrial respiration: are all mitochondria created  
744 equal? *Am J Physiol Heart Circ Physiol* 307: H346-352, 2014.
- 745 30. **Cho CH, Woo JS, Perez CF, and Lee EH.** A focus on extracellular Ca<sup>(2+)</sup> entry  
746 into skeletal muscle. *Exp Mol Med* 49: e378, 2017.
- 747 31. **Silvis MJM, Kaffka Genaamd Dengler SE, Odille CA, Mishra M, van der Kaaij**  
748 **NP, Doevendans PA, Sluijter JPG, de Kleijn DPV, de Jager SCA, Bosch L, and van**  
749 **Hout GPJ.** Damage-associated molecular patterns in myocardial infarction and heart  
750 transplantation: the road to translational success. *Front Immunol* 11: 599511, 2020.
- 751 32. **Clanton TL.** Hypoxia-induced reactive oxygen species formation in skeletal  
752 muscle. *J Appl Physiol (1985)* 102: 2379-2388, 2007.
- 753 33. **Zhang Y, Liu NM, Wang Y, Youn JY, and Cai H.** Endothelial cell calpain as a  
754 critical modulator of angiogenesis. *Biochim Biophys Acta Mol Basis Dis* 1863: 1326-1335,  
755 2017.



- 756 34. **Diez-Roux G and Lang RA.** Macrophages induce apoptosis in normal cells in  
757 vivo. *Development* 124: 3633-3638, 1997.
- 758 35. **Luque E, Pena J, Martin P, Jimena I, and Vaamonde R.** Capillary supply during  
759 development of individual regenerating muscle fibers. *Anat Histol Embryol* 24: 87-89,  
760 1995.
- 761 36. **Skalak TC and Schmid-Schönbein GW.** The microvasculature in skeletal  
762 muscle. IV. A model of the capillary network. *Microvasc Res* 32: 333-347, 1986.
- 763 37. **Krock BL, Skuli N, and Simon MC.** Hypoxia-induced angiogenesis: good and  
764 evil. *Genes Cancer* 2: 1117-1133, 2011.
- 765 38. **Blanco R and Gerhardt H.** VEGF and Notch in tip and stalk cell selection. *Cold*  
766 *Spring Harbor Perspectives in Medicine* 3: a006569, 2013.
- 767 39. **Ziche M and Morbidelli L.** Nitric oxide and angiogenesis. *J Neurooncol* 50: 139-  
768 148, 2000.
- 769 40. **McGahren ED, Beach JM, and Duling BR.** Capillaries demonstrate changes in  
770 membrane potential in response to pharmacological stimuli. *Am J Physiol* 274: H60-H65,  
771 1998.
- 772 41. **Hamilton NB, Attwell D, and Hall CN.** Pericyte-mediated regulation of capillary  
773 diameter: a component of neurovascular coupling in health and disease. *Front*  
774 *Neuroenergetics* 2, 2010.
- 775 42. **Peppiatt CM, Howarth C, Mobbs P, and Attwell D.** Bidirectional control of CNS  
776 capillary diameter by pericytes. *Nature* 443: 700-704, 2006.
- 777 43. **Aird WC.** Endothelial cell heterogeneity. *Cold Spring Harbor Perspectives in*  
778 *Medicine* 2: a006429, 2012.

- 779 44. **Jambusaria A, Hong Z, Zhang L, Srivastava S, Jana A, Toth PT, Dai Y, Malik**  
780 **AB, and Rehman J.** Endothelial heterogeneity across distinct vascular beds during  
781 homeostasis and inflammation. *Elife* 9, 2020.
- 782 45. **Badr I, Brown MD, Egginton S, Hudlická O, Milkiewicz M, and Verhaeg J.**  
783 Differences in local environment determine the site of physiological angiogenesis in rat  
784 skeletal muscle. *Exp Physiol* 88: 565-568, 2003.
- 785 46. **Deveci D, Marshall JM, and Egginton S.** Relationship between capillary  
786 angiogenesis, fiber type, and fiber size in chronic systemic hypoxia. *Am J Physiol Heart*  
787 *Circ Physiol* 281: H241-H252, 2001.
- 788 47. **Lampa SJ, Potluri S, Norton AS, and Laskowski MB.** A morphological technique  
789 for exploring neuromuscular topography expressed in the mouse gluteus maximus  
790 muscle. *Journal of Neuroscience Methods* 138: 51-56, 2004.
- 791 48. **Rakusan K and Turek Z.** The effect of heterogeneity of capillary spacing and O<sub>2</sub>  
792 consumption--blood flow mismatching on myocardial oxygenation. *Adv Exp Med Biol* 191:  
793 257-262, 1985.
- 794 49. **Degens H, Deveci D, Botto-van Bemden A, Hoofd LJ, and Egginton S.**  
795 Maintenance of heterogeneity of capillary spacing is essential for adequate oxygenation  
796 in the soleus muscle of the growing rat. *Microcirculation* 13: 467-476, 2006.
- 797 50. **Messina LM and Carlson BM.** Rapid and complete recovery of responsiveness  
798 to adenosine and norepinephrine by regenerating arterioles of the tibialis anterior muscle  
799 of the hamster after in situ autografting. *Circ Res* 68: 1600-1609, 1991.
- 800 51. **Mancuso MR, Davis R, Norberg SM, O'Brien S, Sennino B, Nakahara T, Yao**  
801 **VJ, Inai T, Brooks P, Freimark B, Shalinsky DR, Hu-Lowe DD, and McDonald DM.**

- 802 Rapid vascular regrowth in tumors after reversal of VEGF inhibition. *J Clin Invest* 116:  
803 2610-2621, 2006.
- 804 52. **Kelly-Goss MR, Sweat RS, Azimi MS, and Murfee WL.** Vascular islands during  
805 microvascular regression and regrowth in adult networks. *Front Physiol* 4: 108, 2013.
- 806 53. **Hansen-Smith FM.** Capillary network patterning during angiogenesis. *Clin Exp*  
807 *Pharmacol Physiol* 27: 830-835, 2000.
- 808 54. **Hansen-Smith FM, Carlson BM, and Irwin KL.** Revascularization of the freely  
809 grafted extensor digitorum longus muscle in the rat. *Am J Anat* 158: 65-82, 1980.
- 810 55. **Vracko R and Benditt EP.** Basal lamina: the scaffold for orderly cell replacement.  
811 Observations on regeneration of injured skeletal muscle fibers and capillaries. *The*  
812 *Journal of Cell Biology* 55: 406-419, 1972.
- 813 56. **Bailey AM, O'Neill TJt, Morris CE, and Peirce SM.** Arteriolar remodeling  
814 following ischemic injury extends from capillary to large arteriole in the microcirculation.  
815 *Microcirculation* 15: 389-404, 2008.
- 816 57. **Mac Gabhann F and Peirce SM.** Collateral capillary arterialization following  
817 arteriolar ligation in murine skeletal muscle. *Microcirculation* 17: 333-347, 2010.
- 818 58. **Socha MJ, Hakim CH, Jackson WF, and Segal SS.** Temperature effects on  
819 morphological integrity and Ca<sup>2+</sup> signaling in freshly isolated murine feed artery  
820 endothelial cell tubes. *Am J Physiol Heart Circ Physiol* 301: H773-H783, 2011.
- 821 59. **Bamboat ZM, Ocuin LM, Balachandran VP, Obaid H, Plitas G, and DeMatteo**  
822 **RP.** Conventional DCs reduce liver ischemia/reperfusion injury in mice via IL-10  
823 secretion. *J Clin Invest* 120: 559-569, 2010.

824 60. **Bearden SE, Payne GW, Chisty A, and Segal SS.** Arteriolar network architecture  
825 and vasomotor function with ageing in mouse gluteus maximus muscle. *J Physiol* 561:  
826 535-545, 2004.

827 61. **Duivenvoorden HM, Spurling A, O'Toole SA, and Parker BS.** Discriminating the  
828 earliest stages of mammary carcinoma using myoepithelial and proliferative markers.  
829 *PLoS One* 13: e0201370, 2018.

830
